# Supplementary material
Source: publisher figshare collection journal article supplement (https://diabetesjournals.figshare.com/ndownloader/files/35321146)
Supplement: Supplementary file 1 [file 35321146]

## Sheet: ST7. 41 CpGs all models
Supplementary Table 7. CpGs associated with maternal glycemic index or glycemic load either in the total cohort or stratified by maternal weight status.
CpG information							A) fully adjusted GI					B) fully adjusted GL					C) fully adjusted GI - normal weight mothers					D) fully adjusted GI - overweight or obese mothers					E) fully adjusted GL - normal weight mothers					F) fully adjusted GL - overweight or obese mothers
CpG	Bonferroni significant in which model?	Chromosome	Position	Nearest Gene	Polymorphic	mQTL	Effect	SE	P value	Direction	I-squared	Effect	SE	P value	Direction	I-squared	Effect	SE	P value	Direction	I-squared	Effect	SE	P value	Direction	I-squared	Effect	SE	P value	Direction	I-squared	Effect	SE	P value	Direction	I-squared
cg00006032	fully adjusted GI - overweight mothers	chr14	66974439	GPHN	no	no	-0.0290803	0.0127227	0.02227	--+	0	-0.0015075	0.00157269	0.3378	---	0	-0.0100397	0.0148337	0.4985	-++	17.5	-0.126091	0.0222305	1.412e-08	--+	69.3	-0.000859466	0.00178592	0.6303	---	0	-0.00185974	0.0031593	0.5561	--+	0
cg00367659	fully adjusted GI - overweight mothers	chr17	33288544	ZNF830	no	no	0.000821156	0.0136887	0.9522	+--	0	0.00181092	0.00137996	0.1894	+++	0	0.0331093	0.0151412	0.02876	++-	0	-0.131832	0.0243799	6.395e-08	--+	40.5	0.00285452	0.00160544	0.0754	+++	0	-0.00141617	0.00267781	0.5969	--+	3.9
cg01078248	fully adjusted GI - overweight mothers	chr7	123197661	NDUFA5	no	no	-0.0154688	0.00790227	0.05029	---	0	-9.68072e-05	0.000931504	0.9172	-++	0	-0.00377012	0.00878223	0.6677	-+-	49.9	-0.0767895	0.0126575	1.305e-09	--+	74.8	-1.83315e-05	0.00107316	0.9864	++-	0	-0.00101458	0.00181026	0.5752	-++	77.5
cg02079551	fully adjusted GI - normal weight mothers	chr10	107023377	SORCS3	yes	no	-0.056827	0.0130373	1.308e-05	---	24.6	-0.00313416	0.00116962	0.00737	---	0	-0.0854895	0.0150623	1.381e-08	---	0	0.0387972	0.0249361	0.1197	+++	0	-0.00349955	0.00132466	0.008246	---	0	-0.0030005	0.00243242	0.2174	+--	74
cg02725014	fully adjusted GI - overweight mothers	chr5	78809520	HOMER1	no	no	-0.00453814	0.00929941	0.6255	+--	64.8	0.00241745	0.00107445	0.02445	++-	0	0.0157316	0.0105597	0.1363	++-	60.5	-0.112989	0.0202214	2.302e-08	---	0	0.00309708	0.00117976	0.00866	++-	44.6	-0.000552988	0.00244391	0.821	-++	27.4
cg02920421	fully adjusted GL - normal weight mothers	chr1	32572534	KPNA6	yes	no	-0.0943429	0.0264387	0.0003592	---	38.6	-0.0110023	0.00215543	3.318e-07	+--	75.2	-0.0899326	0.031076	0.003804	+--	64.4	-0.110934	0.0478984	0.02056	---	7.8	-0.0138159	0.00246149	1.99e-08	+--	74.3	0.00175043	0.00452261	0.6987	++-	0
cg03223949	fully adjusted GL - overweight mothers	chr20	60397915	CDH4	yes	yes	0.0214212	0.0157938	0.175	-++	35.6	0.000116379	0.00119922	0.9227	--+	72.6	0.0290236	0.0186041	0.1187	-++	71.1	-0.0110091	0.0308935	0.7216	+--	0	0.00358319	0.00137263	0.009042	-++	65.3	-0.0127677	0.00223693	1.145e-08	--+	42.7
cg04351062	fully adjusted GI - overweight mothers	chr12	24717058	SOX5	no	yes	0.01188	0.00832699	0.1537	++-	0	0.00031152	0.00107017	0.771	++-	0	0.00965956	0.00940175	0.3042	++-	0	0.0886414	0.0146106	1.304e-09	++-	81.8	0.000207329	0.00118954	0.8616	-+-	48.9	0.00502325	0.00237707	0.03458	+-+	84.7
cg05111873	fully adjusted GL - overweight mothers	chr17	48450072	MRPL27	yes	no	0.0194014	0.0309127	0.5303	+??	0	0.00847843	0.00640657	0.1857	+??	0	-0.00472561	0.035501	0.8941	-??	0	0.201791	0.0605447	0.0008594	+??	0	9.95226e-05	0.00711784	0.9888	+??	0	0.0624264	0.0112506	2.878e-08	+??	0
cg06171242	fully adjusted GI - overweight mothers	chr6	24667490	ACOT13	no	no	-0.0159947	0.00492104	0.001153	---	0	4.56553e-05	0.000563067	0.9354	-++	0	-0.00826596	0.00578686	0.1532	-+-	30.3	-0.0606017	0.0107083	1.52e-08	---	49.5	0.000114571	0.000653586	0.8608	+--	0	-0.000395334	0.00124092	0.75	-++	76
cg06591466	fully adjusted GI - overweight mothers	chr14	96505869	C14orf132	no	no	-0.0146901	0.0089894	0.1022	---	0	-0.00147792	0.00110966	0.1829	---	36.2	8.07475e-05	0.00972352	0.9934	-+-	2.3	-0.107361	0.0179114	2.048e-09	--+	74.8	-0.000507061	0.00124955	0.6849	++-	61.1	-0.00535559	0.00237988	0.02443	---	70.3
cg07254608	fully adjusted GI - overweight mothers	chr8	41997973	AP3M2	no	no	-0.0306149	0.0137454	0.02593	---	0	-0.000991091	0.00142126	0.4856	---	0	-0.00997866	0.0155721	0.5217	-++	46.9	-0.128833	0.0242405	1.068e-07	---	11.5	-0.000332803	0.0016275	0.838	+--	0	-0.0016479	0.00292679	0.5734	---	0
cg09480470	fully adjusted GL - overweight mothers	chr12	124556975	ZNF664-RFLNA	no	yes	0.0143752	0.0471641	0.7605	+?-	0	-0.0197804	0.00879219	0.02446	-?-	85.6	-0.00630814	0.0553362	0.9092	+?-	0	-0.0194355	0.104033	0.8518	-?+	0	-0.0104737	0.0106986	0.3276	+?-	81.6	-0.0842961	0.0158107	9.735e-08	-?-	0
cg09874107	fully adjusted GL - all mothers	chr3	184870896	C3orf70	no	no	0.00280577	0.00286915	0.3281	-++	64.9	0.00206937	0.000384737	7.504e-08	+++	67.6	0.0017799	0.00325261	0.5842	-++	68.5	0.00657364	0.00658604	0.3182	+++	0	0.00198256	0.000435307	5.254e-06	+++	74.6	0.00322727	0.000919187	0.0004464	+++	0
cg12972275	fully adjusted GI - overweight mothers	chr4	122722461	EXOSC9	yes	no	-0.00599416	0.00483456	0.215	---	0	-0.000415346	0.000568861	0.4653	+-+	0	-0.0017347	0.00552769	0.7537	+--	49.3	-0.0467304	0.00750741	4.829e-10	---	48.6	7.44763e-05	0.000637065	0.9069	+-+	0	-0.00314464	0.00118282	0.007847	--+	17.3
cg13358349	fully adjusted GI - overweight mothers	chr10	71211210	TSPAN15	yes	no	-0.0257199	0.00973016	0.00821	---	0	0.00051034	0.00126431	0.6865	-+-	67.2	-0.0106603	0.011201	0.3412	-+-	63	-0.109849	0.0198139	2.956e-08	---	28.9	0.0011414	0.00140281	0.4158	++-	41.8	-0.00224235	0.00297025	0.4503	-+-	30.8
cg13445358	fully adjusted GI - overweight mothers	chr12	53661749	ESPL1	yes	no	-0.0101432	0.00562617	0.07141	--+	0	-0.000148776	0.000741925	0.8411	+-+	0	-0.00372069	0.0062458	0.5514	-++	0	-0.0623355	0.0111013	1.964e-08	--+	0	-0.000444185	0.000822443	0.5891	--+	0	-0.00160399	0.0015926	0.3139	--+	0
cg13721560	fully adjusted GI - overweight mothers	chr2	44222568	LRPPRC	no	no	-0.0137971	0.00625285	0.02735	--+	54.3	-0.000625857	0.000764026	0.4127	--+	0	0.000678602	0.00723272	0.9252	+-+	26.2	-0.0675313	0.0121645	2.832e-08	--+	56.5	0.000343454	0.000846759	0.685	+++	0	-0.00321887	0.00165684	0.05204	--+	72.6
cg13740771	fully adjusted GI - overweight mothers	chr20	3026904	MRPS26	no	no	-0.012032	0.00909365	0.1858	---	0	-0.00231975	0.00108153	0.03196	---	50.2	0.00770386	0.0102242	0.4512	-++	29.8	-0.112795	0.0205988	4.355e-08	---	0.5	-0.00167435	0.00121857	0.1694	---	55.2	-0.00468503	0.00263535	0.07544	---	0
cg15225042	fully adjusted GI - overweight mothers	chr19	13044582	FARSA	no	no	-0.0140483	0.0072423	0.05241	-++	37.3	-0.000680177	0.000823978	0.4091	-++	76.1	-0.00763831	0.00798288	0.3387	-++	42.1	-0.0774163	0.0143484	6.834e-08	--+	70.5	-0.000381205	0.000895823	0.6704	--+	0	-0.0019801	0.00193879	0.3071	-++	89.5
cg16031283	fully adjusted GI - overweight mothers	chr22	20861701	MED15	no	no	-0.0044568	0.0078146	0.5685	---	0	-0.000648615	0.000893469	0.4679	--+	0	0.0154855	0.00901358	0.08579	+++	0	-0.0921853	0.0169917	5.785e-08	---	46.3	0.000162656	0.00104166	0.8759	+-+	18.3	-0.0029038	0.00191467	0.1294	---	51.8
cg16169361	fully adjusted GI - overweight mothers	chr8	8751409	MFHAS1	yes	no	-0.017093	0.00813187	0.03556	-+-	61	-0.000402413	0.000857715	0.6389	---	0	0.00428561	0.00931039	0.6453	++-	28.8	-0.100696	0.0156339	1.188e-10	---	24.4	-0.000997562	0.000967922	0.3027	+--	0	-0.000172028	0.00191092	0.9283	-+-	88.7
cg16604801	fully adjusted GI - overweight mothers	chr17	2718310	RAP1GAP2	no	no	-0.0163595	0.00653919	0.01236	-+-	26	-0.000679877	0.000770138	0.3773	---	0	-0.00892216	0.00711753	0.21	-+-	80.4	-0.0709806	0.0128528	3.341e-08	---	71.1	-0.000112612	0.000849946	0.8946	++-	0	-0.00278244	0.00166569	0.09483	--+	75.6
cg17582259	fully adjusted GI - overweight mothers	chr17	33288330	CCT6B	no	no	-0.00767274	0.00924338	0.4065	---	0	0.000220027	0.00119712	0.8542	-++	0	0.0065828	0.0101321	0.5159	++-	0	-0.0941583	0.0167705	1.971e-08	--+	55.3	0.000748882	0.00130751	0.5668	++-	0	-0.000753263	0.00264215	0.7756	--+	0
cg18202627	fully adjusted GI - overweight mothers	chr2	200776533	C2orf69	no	no	-0.00983035	0.00761075	0.1965	-+-	9.7	0.000121118	0.000952441	0.8988	-++	0	0.00585757	0.00851451	0.4915	++-	70.4	-0.0933434	0.0120161	7.961e-15	---	0	0.000984664	0.00110157	0.3714	+++	0	-0.00464768	0.00189882	0.01438	--+	86.7
cg18211447	fully adjusted GI - overweight mothers	chr14	102771717	MOK	no	no	-0.00817312	0.00981885	0.4052	-++	79.7	0.000874476	0.00105425	0.4068	-++	0	0.00966684	0.0113435	0.3941	-++	73.7	-0.117336	0.0189986	6.574e-10	---	89	0.000657471	0.00119733	0.5829	-++	0	0.00023566	0.00216703	0.9134	-+-	79.4
cg18290075	fully adjusted GI - overweight mothers	chr3	153840477	ARHGEF26	no	yes	-0.043736	0.0086449	4.211e-07	---	0	-0.00089582	0.00106507	0.4003	--+	0	-0.0380803	0.00996971	0.0001337	--+	0	-0.0990053	0.0156511	2.519e-10	---	54.2	-3.15901e-05	0.00119075	0.9788	+--	0	-0.00859708	0.00245504	0.0004621	-++	93.2
cg20927656	fully adjusted GI - overweight mothers	chr12	7863229	DPPA3	yes	yes	0.214834	0.129913	0.09819	+?+	0	-0.00454567	0.0251808	0.8567	+?-	0	0.0829882	0.147082	0.5726	+?+	0	1.35488	0.241874	2.124e-08	+?+	61.3	-0.0138353	0.0282607	0.6244	-?+	0	0.0787919	0.0589031	0.181	+?-	41.5
cg21301148	fully adjusted GI - all mothers AND fully adjusted GI - normal weight mothers	chr14	23878195	MYH6	yes	no	0.0994305	0.0186678	1.002e-07	+++	0	0.00389392	0.00149241	0.009077	+++	37.8	0.120327	0.021363	1.776e-08	+++	0	0.0386472	0.040201	0.3364	+++	0	0.00425456	0.00173048	0.01395	+++	49.4	0.000421182	0.00341753	0.9019	-+-	0
cg23345004	fully adjusted GL - overweight mothers	chr18	44526430	KATNAL2	no	yes	-0.00808893	0.0374827	0.8291	+-+	5.3	-0.00385387	0.00321206	0.2302	---	0	0.0231265	0.0446812	0.6047	+++	0	-0.146172	0.0765862	0.05631	+--	52.5	0.00278215	0.00372239	0.4548	-++	8.3	-0.0352267	0.00634359	2.806e-08	---	0
cg23347399	fully adjusted GI - overweight mothers	chr5	140766911	PCDHGA1	no	yes	0.0420061	0.038359	0.2735	-++	0	0.00349944	0.00346394	0.3124	++-	15.5	-0.0342873	0.0450085	0.4462	---	0	0.399521	0.0745304	8.299e-08	+++	17.8	0.00390567	0.00391414	0.3184	++-	48.2	0.0039026	0.00735221	0.5956	+--	68.5
cg24340911	fully adjusted GI - overweight mothers	chr17	5342028	C1QBP	no	no	0.00937961	0.00721978	0.1939	++-	0	0.00109443	0.000743805	0.1412	+++	21	0.0249435	0.00803032	0.001895	+++	0	-0.0766157	0.0144103	1.056e-07	---	71.5	0.00132563	0.000844815	0.1166	++-	76.7	-0.000471242	0.00164555	0.7746	-++	88.3
cg24458009	fully adjusted GI - overweight mothers	chr12	47472775	AMIGO2	yes	yes	-0.0393215	0.0203452	0.05327	---	0	-0.00272681	0.00211903	0.1982	---	0	-0.00135908	0.0230645	0.953	-++	0	-0.21135	0.0328364	1.223e-10	---	72	-0.00169764	0.00236529	0.4729	--+	0	-0.00855322	0.00437812	0.05075	---	77.2
cg24688926	fully adjusted GI - overweight mothers	chr19	6737877	GPR108	no	no	-0.0156585	0.00640576	0.01451	---	29.7	-0.000594702	0.000767614	0.4385	-+-	42.9	-0.00380825	0.00736335	0.605	--+	0	-0.0739584	0.0130385	1.409e-08	---	83	-0.000321226	0.000882727	0.7159	++-	21.7	-0.00167425	0.00152267	0.2715	-+-	34
cg25044186	fully adjusted GL - overweight mothers	chr6	170494475	LOC154449	yes	yes	0.0134459	0.0147933	0.3634	+++	0	-0.00439933	0.00128515	0.0006189	+--	0	0.0379383	0.0174425	0.02963	+++	0	-0.0555237	0.031166	0.07482	---	45.8	-0.00250268	0.00149308	0.0937	+--	55.4	-0.0132348	0.00247565	8.993e-08	---	0
cg25832796	fully adjusted GI - overweight mothers	chr14	24038103	JPH4	yes	yes	-0.0500161	0.021306	0.0189	---	57.9	-0.000727355	0.00194207	0.708	-+-	14.9	-0.0325049	0.023527	0.1671	---	0	-0.253872	0.0406168	4.093e-10	--+	94.8	-0.000358957	0.00221691	0.8714	-+-	60.7	-0.0110768	0.00411165	0.00706	--+	91.7
cg26474288	fully adjusted GI - overweight mothers	chr3	98451287	ST3GAL6-AS1	no	no	-0.0206505	0.00987545	0.03652	---	0	-0.000809955	0.00105379	0.4421	---	0	0.00203305	0.0111103	0.8548	++-	0	-0.107881	0.0189617	1.275e-08	---	0	-0.000772545	0.00122803	0.5293	---	0	0.000558021	0.00208498	0.789	-+-	0
cg26729101	fully adjusted GL - normal weight mothers	chr16	229500	HBQ1	yes	no	-0.0279465	0.0160557	0.08175	+-+	61.6	-0.00531378	0.0012903	3.818e-05	+--	0	-0.0501602	0.0180098	0.00535	+--	71.2	0.0314542	0.0348191	0.3663	+++	0	-0.00749978	0.00140858	1.013e-07	+--	56.6	0.00265321	0.00287677	0.3564	-+-	0
cg26985201	fully adjusted GI - overweight mothers	chr3	197517876	LRCH3	no	no	-0.0131227	0.00878462	0.1352	---	0	-0.000369725	0.000889054	0.6775	-+-	0	0.00204219	0.0102572	0.8422	++-	0	-0.0845316	0.0156602	6.745e-08	---	55.4	-0.000993584	0.00100387	0.3223	---	0	0.00126341	0.00201713	0.5311	-++	82.2
cg27193519	fully adjusted GI - overweight mothers	chr16	4714443	MGRN1	yes	yes	0.0332151	0.0288413	0.2495	++-	13.4	-0.000654346	0.00242988	0.7877	+--	0	0.00505741	0.0335274	0.8801	+--	0	0.292281	0.0545858	8.578e-08	+++	93.9	-0.00180593	0.0028405	0.5249	+--	0	0.0032273	0.0046836	0.4908	++-	0
cg27528695	fully adjusted GL - all mothers	chr1	109643479	SCARNA2	yes	yes	0.00485577	0.0147076	0.7413	-++	84.4	0.0100057	0.00187671	9.739e-08	+++	0	0.00561926	0.0163921	0.7317	-++	80	-0.00663068	0.0343622	0.847	-+-	67.3	0.00879737	0.00214112	3.978e-05	+++	0	0.0118391	0.00388334	0.002298	+++	0

## Sheet: ST8. Lookup early childhood
Supplementary Table 8. Meta-analysis results for associations between maternal glycemic index and glycemic load during pregnancy and methylation level in early childhood (n=554 , from INMA (4.5y) and Generation R (6.1y)).
CpG information							A) fully adjusted GI					B) fully adjusted GL					C) fully adjusted GI - mothers with normal weight					D) fully adjusted GI - mothers with overweight or obesity					E) fully adjusted GL - mothers with normal weight					F) fully adjusted GL - mothers with overweight or obesity
CpG	Bonferroni significant in which model?	Chromosome	Position	Nearest Gene	Polymorphic	mQTL	Effect#	SE#	P value	Direction	I-squared	Effect#	SE#	P value	Direction	I-squared	Effect#	SE#	P value	Direction	I-squared	Effect#	SE#	P value	Direction	I-squared	Effect#	SE#	P value	Direction	I-squared	Effect#	SE#	P value	Direction	I-squared
cg21301148	fully adjusted GI - all mothers AND fully adjusted GI - normal weight mothers	chr14	23878195	MYH6	yes	no	0.0524415	0.0337468	0.1202	++	0	0.0100102	0.00449686	0.02601	++	84.4	0.0491371	0.038743	0.2047	++	0	0.0030322	0.00535398	0.5712	++-+	0	0.00283431	0.00537796	0.5982	++	0	0.0136699	0.00789673	0.08344	++	82.4
cg02079551	fully adjusted GI - normal weight mothers	chr10	107023377	SORCS3	yes	no	0.0248509	0.0232551	0.2852	++	0	0.0056914	0.00312118	0.06823	++	0	0.0339847	0.0264119	0.1982	+-	0	0.00687933	0.00346702	0.04723	++++	24.5	0.00649856	0.00348167	0.06197	++	0	0.00254331	0.00578049	0.66	++	0
cg00006032	fully adjusted GI - overweight mothers	chr14	66974439	GPHN	no	no	-0.000373354	0.026862	0.9889	+-	0	0.00280728	0.00351207	0.4241	++	0	-0.0170288	0.0309174	0.5818	+-	58.2	0.000714675	0.00410651	0.8618	+-++	37.2	0.000468235	0.00411973	0.9095	+-	73.7	0.00675791	0.0071533	0.3448	++	0
cg00367659	fully adjusted GI - overweight mothers	chr17	33288544	ZNF830	no	no	0.00904681	0.0197358	0.6467	+-	0	0.00347007	0.00269679	0.1982	++	0	0.0166861	0.0237873	0.483	++	0	0.0022416	0.00315298	0.4771	+--+	0	0.0022608	0.00316464	0.475	+-	0	0.0100411	0.00484877	0.03837	++	70.2
cg01078248	fully adjusted GI - overweight mothers	chr7	123197661	NDUFA5	no	no	0.0081539	0.0184798	0.659	++	0	0.00262803	0.00250911	0.2949	++	0	0.00133487	0.0226599	0.953	+-	0	0.00127271	0.00306484	0.678	+-++	0	0.00119632	0.00307586	0.6973	+-	0	0.00283545	0.00477603	0.5527	+-	17.8
cg02725014	fully adjusted GI - overweight mothers	chr5	78809520	HOMER1	no	no	0.0136755	0.0159976	0.3926	+-	0	0.00612186	0.00215354	0.004473	++	0	0.0108891	0.0205232	0.5957	++	0	0.00366667	0.00288275	0.2034	++++	0	0.00338796	0.00289738	0.2423	++	0	0.01644	0.00386102	2.063e-05	++	0
cg04351062	fully adjusted GI - overweight mothers	chr12	24717058	SOX5	no	yes	0.0218504	0.0201916	0.2792	-+	22.4	0.000488187	0.00278566	0.8609	-+	0	0.0309349	0.0240011	0.1974	-+	60.5	0.00188609	0.00362309	0.6027	-++-	10.7	0.00200245	0.00364062	0.5823	-+	61.6	0.000313005	0.00437152	0.9429	+-	0
cg06171242	fully adjusted GI - overweight mothers	chr6	24667490	ACOT13	no	no	0.00514409	0.00932634	0.5812	+-	38	0.00275007	0.00122498	0.02477	++	39.4	0.00416328	0.0107476	0.6985	+-	0	0.00273222	0.00143576	0.05704	+++-	0	0.00278169	0.00144078	0.05352	++	0	0.00131494	0.0024631	0.5934	+-	10.1
cg06591466	fully adjusted GI - overweight mothers	chr14	96505869	C14orf132	no	no	-0.00203284	0.0196544	0.9176	+-	0	0.00367883	0.00257314	0.1528	++	0	-0.031993	0.0224492	0.1541	--	0	2.6887e-06	0.0032341	0.9993	-+++	0	-0.000454609	0.00324929	0.8887	-+	0	0.0162465	0.0042047	0.0001116	++	4
cg07254608	fully adjusted GI - overweight mothers	chr8	41997973	AP3M2	no	no	0.00785464	0.0247788	0.7513	++	0	0.00300868	0.00336497	0.3713	++	0	-0.0086561	0.029919	0.7723	--	0	-0.000157955	0.00425354	0.9704	--++	23	-0.00101218	0.00427726	0.8129	--	0	0.0140801	0.0060529	0.02001	++	10.3
cg12972275	fully adjusted GI - overweight mothers	chr4	122722461	EXOSC9	yes	no	0.00714012	0.0102043	0.4841	+-	0	0.00239243	0.00133589	0.07331	+-	0	0.0074581	0.0112467	0.5072	++	0	0.00213966	0.00145366	0.141	+++-	0	0.00213194	0.00145664	0.1433	++	0	0.00444978	0.00285838	0.1195	++	0
cg13358349	fully adjusted GI - overweight mothers	chr10	71211210	TSPAN15	yes	no	0.0338252	0.0183	0.06455	++	50.1	0.00460453	0.00251198	0.0668	++	0	0.0283703	0.020224	0.1607	++	0	0.00493993	0.00285368	0.08344	+++-	0	0.00485769	0.00286191	0.08963	++	0	0.00276642	0.00506918	0.5852	+-	0
cg13445358	fully adjusted GI - overweight mothers	chr12	53661749	ESPL1	yes	no	-0.00505487	0.0119636	0.6726	-+	52.7	0.000600011	0.0015618	0.7008	-+	67.9	0.00300141	0.0143082	0.8338	-+	81.7	-0.000354446	0.00207139	0.8641	-+--	4	-0.000281626	0.00207867	0.8922	-+	63.8	0.00125423	0.00343494	0.715	++	0
cg13721560	fully adjusted GI - overweight mothers	chr2	44222568	LRPPRC	no	no	-0.013682	0.0142373	0.3366	+-	64.8	0.000369235	0.00193685	0.8488	+-	0	-0.00743164	0.0185657	0.6889	+-	82.6	0.000494223	0.00262454	0.8506	+--+	54.4	0.000654217	0.00264034	0.8043	+-	79.5	-0.0014795	0.00326338	0.6503	-+	59.1
cg13740771	fully adjusted GI - overweight mothers	chr20	3026904	MRPS26	no	no	0.00850768	0.0162256	0.6	++	0	0.0031155	0.00216404	0.15	++	71	0.0224534	0.0196096	0.2522	++	0	0.00151866	0.00272856	0.5778	++-+	26.8	0.00179275	0.00274266	0.5133	++	0	0.00930634	0.00308029	0.002517	-+	84.1
cg15225042	fully adjusted GI - overweight mothers	chr19	13044582	FARSA	no	no	0.000732264	0.0149568	0.961	+-	0	0.00176441	0.00201975	0.3823	++	0	-0.0104176	0.0171393	0.5433	+-	43.6	0.00144775	0.00233536	0.5353	+-++	0	0.00137165	0.00234262	0.5582	+-	0	0.00145772	0.00423759	0.7308	+-	0
cg16031283	fully adjusted GI - overweight mothers	chr22	20861701	MED15	no	no	0.0490196	0.0177364	0.005714	++	70.9	0.00753171	0.00230959	0.00111	++	82.6	0.0267845	0.0224244	0.2323	+-	58	0.00826002	0.0029794	0.005565	++++	74.8	0.00739048	0.0029942	0.01358	++	56.7	0.00792169	0.00416659	0.05727	+-	83.3
cg16169361	fully adjusted GI - overweight mothers	chr8	8751409	MFHAS1	yes	no	0.0277	0.0174192	0.1118	++	0	0.00398919	0.00237532	0.09307	+-	52.8	0.0198691	0.0200895	0.3226	+-	23.7	0.00333847	0.00280698	0.2343	+-++	45.5	0.00277512	0.00282558	0.326	+-	52.8	0.00872517	0.00365459	0.01697	++	0
cg16604801	fully adjusted GI - overweight mothers	chr17	2718310	RAP1GAP2	no	no	0.0127185	0.011443	0.2664	++	0	0.000364312	0.00151572	0.8101	-+	0	0.0179204	0.0137451	0.1923	++	37.2	0.00090927	0.00182827	0.619	-+++	0	0.000848018	0.00183607	0.6442	-+	44.3	0.000376672	0.00273943	0.8906	-+	0
cg17582259	fully adjusted GI - overweight mothers	chr17	33288330	CCT6B	no	no	0.00645761	0.0236141	0.7845	+-	0	0.0041296	0.00316767	0.1923	++	0	-0.00146701	0.0268079	0.9564	+-	5.1	-0.00050611	0.00372991	0.8921	+-++	0	-0.000716321	0.00374917	0.8485	+-	2.7	0.0115611	0.00520285	0.02628	++	25.5
cg18202627	fully adjusted GI - overweight mothers	chr2	200776533	C2orf69	no	no	0.00894447	0.012018	0.4567	+-	82.7	0.00126629	0.00166463	0.4468	+-	81.4	-0.0130835	0.0141853	0.3564	+-	88.2	-0.00155575	0.0019688	0.4294	+-++	78.8	-0.00179908	0.00197414	0.3621	+-	91.1	0.00639746	0.00378613	0.09108	++	0
cg18211447	fully adjusted GI - overweight mothers	chr14	102771717	MOK	no	no	0.00137032	0.015829	0.931	-+	0	-0.00228042	0.00206498	0.2694	--	0	0.0166768	0.0186138	0.3703	++	0	-0.00185258	0.00248445	0.4559	-+--	29.9	-0.00137221	0.00249625	0.5825	-+	0	-0.00397293	0.00334826	0.2354	-+	0
cg18290075	fully adjusted GI - overweight mothers	chr3	153840477	ARHGEF26	no	yes	-0.00874871	0.0257839	0.7344	+-	5.8	0.0009195	0.0034513	0.7899	+-	0	0.0080916	0.031262	0.7958	+-	0	0.000924022	0.00428336	0.8292	+++-	0	0.00110779	0.00430251	0.7968	++	0	0.00896194	0.00620566	0.1487	++	0
cg20927656	fully adjusted GI - overweight mothers	chr12	7863229	DPPA3	yes	yes	0.368865	0.477483	0.4398	?+	0	0.0223212	0.0649893	0.7313	?+	0	0.928895	0.536845	0.08358	?+	0	0.113554	0.0862191	0.1878	?+?-	0	0.1189	0.0867824	0.1707	?+	0	0.109246	0.121591	0.3689	?+	0
cg23347399	fully adjusted GI - overweight mothers	chr5	140766911	PCDHGA1	no	yes	-0.116176	0.0823872	0.1585	--	0	-0.00840676	0.0108117	0.4368	-+	0	-0.125306	0.0937459	0.1813	--	0	-0.00777358	0.0122373	0.5253	----	0	-0.00636293	0.0122842	0.6045	--	0	-0.0607011	0.0157962	0.0001217	-+	75.5
cg24340911	fully adjusted GI - overweight mothers	chr17	5342028	C1QBP	no	no	0.0191173	0.0133475	0.1521	++	27	0.00175278	0.0018832	0.352	++	0	0.0208667	0.0166431	0.2099	++	0	0.00119321	0.00235846	0.6129	++--	0	0.00126936	0.00236688	0.5918	++	0	0.0037516	0.00370617	0.3114	++	0
cg24458009	fully adjusted GI - overweight mothers	chr12	47472775	AMIGO2	yes	yes	0.0361587	0.0451156	0.4229	-+	52.1	-0.00222554	0.00606405	0.7136	-+	0	0.0310395	0.0571115	0.5868	-+	76.5	-0.00125873	0.00747926	0.8664	-++-	66.6	-0.00137629	0.00752188	0.8548	-+	87.5	-0.0091114	0.0100391	0.3641	+-	74.2
cg24688926	fully adjusted GI - overweight mothers	chr19	6737877	GPR108	no	no	-0.00792509	0.0144653	0.5838	-+	0	0.0020005	0.00199032	0.3148	++	6.6	-0.00395281	0.0170824	0.817	-+	22.7	0.000936374	0.00232857	0.6876	-+--	14.7	0.0011949	0.00233572	0.6089	-+	10	-0.00228322	0.004159	0.583	--	0
cg25832796	fully adjusted GI - overweight mothers	chr14	24038103	JPH4	yes	yes	0.0314638	0.0341768	0.3573	++	0	0.00754764	0.00458198	0.09951	++	0	-0.0061143	0.0395786	0.8772	-+	0	0.00484503	0.00536094	0.3661	+-++	46.7	0.0038617	0.00538407	0.4732	+-	28.8	0.0135188	0.00855347	0.114	++	0
cg26474288	fully adjusted GI - overweight mothers	chr3	98451287	ST3GAL6-AS1	no	no	0.00252767	0.0195056	0.8969	+-	0	0.00347211	0.00259413	0.1807	++	0	0.0105777	0.0246754	0.6682	+-	34.1	0.00130511	0.00322734	0.6859	+--+	29	0.00168645	0.00324092	0.6028	+-	46.8	0.00564366	0.00554466	0.3087	++	56.2
cg26985201	fully adjusted GI - overweight mothers	chr3	197517876	LRCH3	no	no	0.0188438	0.0133835	0.1591	++	0	0.00208769	0.0018501	0.2591	++	0	0.0222019	0.016184	0.1701	++	0	0.00349576	0.00223694	0.1181	++-+	0	0.00349107	0.00224291	0.1196	++	0	0.000462345	0.00399297	0.9078	+-	0
cg27193519	fully adjusted GI - overweight mothers	chr16	4714443	MGRN1	yes	yes	-0.0128513	0.050958	0.8009	-+	7.6	-0.00602015	0.00672295	0.3705	--	0	0.0147987	0.0587739	0.8012	+-	0	-0.00397392	0.00779763	0.6103	---+	75.2	-0.00198405	0.00783995	0.8002	--	0	-0.0119692	0.0119562	0.3168	--	0
cg09874107	fully adjusted GL - all mothers	chr3	184870896	C3orf70	no	no	0.0115394	0.00689117	0.09403	++	0	0.000829781	0.000948547	0.3817	++	0	0.0166031	0.00867956	0.05576	++	0	0.00278488	0.00129775	0.03188	-++-	49.5	0.00277702	0.00130361	0.03315	-+	64.3	-0.00302411	0.00168367	0.07247	+-	87
cg27528695	fully adjusted GL - all mothers	chr1	109643479	SCARNA2	yes	yes	0.0180585	0.0382288	0.6367	++	0	0.00159123	0.00501308	0.7509	++	0	0.0752008	0.0438511	0.08636	++	22.2	0.00246478	0.0060649	0.6844	++--	0	0.0031446	0.00608664	0.6054	++	0	-0.00168556	0.0096437	0.8612	+-	0
cg02920421	fully adjusted GL - normal weight mothers	chr1	32572534	KPNA6	yes	no	0.0523925	0.048935	0.2843	++	0	0.0122696	0.00639261	0.05494	++	0	0.0854928	0.0603765	0.1568	++	0	0.01401	0.00758117	0.0646	++-+	0	0.014122	0.0076109	0.06353	++	0	0.0167219	0.0120714	0.166	++	0
cg26729101	fully adjusted GL - normal weight mothers	chr16	229500	HBQ1	yes	no	-0.00567685	0.0298795	0.8493	-+	0	0.0104113	0.00392552	0.007997	++	0	0.0284148	0.0360429	0.4305	++	0	0.0103363	0.00466754	0.02679	++--	30	0.0111166	0.00468297	0.0176	++	0	0.0065972	0.0077438	0.3943	++	0
cg03223949	fully adjusted GL - overweight mothers	chr20	60397915	CDH4	yes	yes	-0.0445912	0.0260561	0.08702	--	0	-0.000317742	0.00332425	0.9239	+-	0	-0.0605396	0.0277113	0.02891	--	0	-0.00129173	0.00348	0.7105	--+-	0	-0.00160487	0.00348805	0.6454	--	0	0.00535755	0.00706954	0.4485	++	0
cg05111873	fully adjusted GL - overweight mothers	chr17	48450072	MRPL27	yes	no	-	-	-	-	-	-	-	-	-	-	-	-	-	-	-	-	-	-	-	-	-	-	-	-	-	-	-	-	-	-
cg09480470	fully adjusted GL - overweight mothers	chr12	124556975	ZNF664-RFLNA	no	yes	0.171442	0.151509	0.2578	?+	0	0.0144121	0.0204785	0.4816	?+	0	-0.100054	0.178822	0.5758	?-	0	-0.000315222	0.028074	0.991	?-?+	85.8	-0.00775186	0.0282131	0.7835	?-	0	0.078838	0.0385236	0.04071	?+	0
cg23345004	fully adjusted GL - overweight mothers	chr18	44526430	KATNAL2	no	yes	-0.0220119	0.0637625	0.7299	-+	78.7	-0.00780679	0.00852463	0.3598	-+	72.4	-0.0752855	0.0722003	0.2971	-+	69.8	-0.0107323	0.00974822	0.2709	-+-+	59.7	-0.0117427	0.00977547	0.2297	-+	0	-0.00522585	0.0176793	0.7675	-+	77.5
cg25044186	fully adjusted GL - overweight mothers	chr6	170494475	LOC154449	yes	yes	0.0518707	0.0270329	0.05501	++	0	0.00576231	0.00358906	0.1084	++	0	0.0769679	0.0301134	0.01059	++	0	0.00479042	0.00428873	0.264	+--+	0	0.00484203	0.00430254	0.2604	+-	13.6	0.00930782	0.0077153	0.2277	++	0
CpG: cytosine-phosphate-guanine site. Chr: chromosome. mQTL: methylation quantitative trait locus. SE: standard error. # Effect size and SE are presented as percentage change in DNA methylation per 1-point increase in glycemic index or load. Bold and underlined are the results that reached P<0.0012, but these were not persistent findings. These Bonferroni significant associations were observed in…

## Sheet: ST9. Lookup late childhood
Supplementary Table 9. Meta-analysis results for associations between maternal glycemic index and glycemic load during pregnancy and methylation level in late childhood (n=1255, from ALSPAC (7.5y), INMA (8.8y), Generation R (9.8y)).
CpG information							A) fully adjusted GI					B) fully adjusted GL					C) fully adjusted GI - mothers with normal weight					D) fully adjusted GI - mothers with overweight or obesity					E) fully adjusted GL - mothers with normal weight					F) fully adjusted GL - mothers with overweight or obesity
CpG	Bonferroni significant in which model?	Chromosome	Position	Nearest Gene	Polymorphic	mQTL	Effect#	SE#	P value	Direction	I-squared	Effect#	SE#	P value	Direction	I-squared	Effect#	SE#	P value	Direction	I-squared	Effect#	SE#	P value	Direction	I-squared	Effect#	SE#	P value	Direction	I-squared	Effect#	SE#	P value	Direction	I-squared
cg21301148	fully adjusted GI - all mothers AND fully adjusted GI - normal weight mothers	chr14	23878195	MYH6	yes	no	-0.035364	0.0264959	0.182	---	0	0.00167571	0.00386133	0.6643	-++	0	-0.047136	0.029789	0.1136	---	0	0.036121	0.0519483	0.4869	+++	0	0.00153064	0.0044552	0.7312	++-	0	0.00285667	0.00777284	0.7132	-++	86.7
cg02079551	fully adjusted GI - normal weight mothers	chr10	107023377	SORCS3	yes	no	0.0108447	0.0168068	0.5188	++-	0	-0.00268817	0.00253657	0.2893	-+-	0	0.0185576	0.0189353	0.3271	++-	0	-0.00603854	0.0378704	0.8733	-++	0	-0.00192854	0.0029421	0.5121	-+-	43.9	-0.000570133	0.00551242	0.9176	--+	34.7
cg00006032	fully adjusted GI - overweight mothers	chr14	66974439	GPHN	no	no	0.0117149	0.01141	0.3046	++-	20.5	0.00183676	0.00195747	0.3481	++-	19.8	0.0210956	0.0127138	0.09706	++-	0	-0.00821085	0.0250596	0.7432	++-	16.6	0.00301669	0.00229013	0.1878	++-	7.4	0.00513544	0.00410741	0.2112	+++	0
cg00367659	fully adjusted GI - overweight mothers	chr17	33288544	ZNF830	no	no	0.00918185	0.0111436	0.41	-++	60	0.00129142	0.00176422	0.4642	-++	47.9	0.00979004	0.0126445	0.4388	-++	8.1	-0.00396408	0.0240688	0.8692	++-	80.4	0.00189497	0.0020595	0.3575	-++	18.1	0.00241377	0.00352135	0.493	+++	0
cg01078248	fully adjusted GI - overweight mothers	chr7	123197661	NDUFA5	no	no	0.00742	0.00718665	0.3019	++-	0	0.00123924	0.00124417	0.3192	++-	0	0.0168394	0.00824664	0.04115	+++	0	-0.0124168	0.0158426	0.4332	-+-	0	0.00118466	0.0014483	0.4134	++-	0	0.00750639	0.0027058	0.005534	+++	0
cg02725014	fully adjusted GI - overweight mothers	chr5	78809520	HOMER1	no	no	-0.0237214	0.00917984	0.009764	---	79.4	0.000209957	0.00157044	0.8936	++-	58.9	-0.0249801	0.0103787	0.01609	---	76.5	-0.0257268	0.0181817	0.1571	-+-	54	-0.00158608	0.00177589	0.3718	++-	73	0.00347989	0.00340455	0.3067	-++	10.8
cg04351062	fully adjusted GI - overweight mothers	chr12	24717058	SOX5	no	yes	-0.0134539	0.0112352	0.2311	-+-	0	0.000697914	0.00200513	0.7278	++-	0	0.00194247	0.0123278	0.8748	-++	28.9	-0.084389	0.0265483	0.001479	---	0	0.00203076	0.00214332	0.3434	++-	0	-0.003702	0.00483995	0.4443	---	0
cg06171242	fully adjusted GI - overweight mothers	chr6	24667490	ACOT13	no	no	-0.00515601	0.00489653	0.2923	-+-	0	-0.00080288	0.000846784	0.3431	--+	8.8	-0.00632844	0.0053932	0.2406	---	0	0.00618859	0.0119874	0.6057	++-	0	-0.000935536	0.00094035	0.3198	--+	1.1	0.00040828	0.00194523	0.8338	-+-	0
cg06591466	fully adjusted GI - overweight mothers	chr14	96505869	C14orf132	no	no	-0.00714451	0.00847901	0.3994	---	0	-0.000807817	0.00149879	0.5899	+--	0	-0.0133052	0.00931781	0.1533	---	0	0.00199222	0.0219702	0.9277	+--	0	-0.00204104	0.00165119	0.2164	---	0	0.0039662	0.00370724	0.2847	+--	0
cg07254608	fully adjusted GI - overweight mothers	chr8	41997973	AP3M2	no	no	0.0107004	0.0120333	0.3739	++-	57.1	0.00157099	0.0020404	0.4413	++-	0	0.0150184	0.0140698	0.2858	++-	43	-0.00533973	0.021721	0.8058	++-	55.5	0.00238161	0.00229802	0.3	++-	9.1	0.00421587	0.00349848	0.2282	+++	0
cg12972275	fully adjusted GI - overweight mothers	chr4	122722461	EXOSC9	yes	no	-0.00876228	0.00603027	0.1462	-+-	0	-0.000303558	0.000856916	0.7232	-+-	0	-0.00548781	0.00669388	0.4123	-+-	0	-0.00996926	0.0138447	0.4715	-+-	8.6	-0.000860474	0.000985199	0.3824	++-	20.1	0.00326152	0.00175464	0.06306	-++	75.1
cg13358349	fully adjusted GI - overweight mothers	chr10	71211210	TSPAN15	yes	no	0.00284504	0.0084787	0.7372	-+-	61	-0.000579535	0.00146912	0.6932	-+-	78.9	0.00534365	0.0094852	0.5732	-+-	53.9	-0.00193759	0.0205651	0.9249	++-	51	-0.00232722	0.00171135	0.1739	-+-	77.6	0.0062103	0.00320792	0.05288	++-	18.2
cg13445358	fully adjusted GI - overweight mothers	chr12	53661749	ESPL1	yes	no	0.00467585	0.00446703	0.2952	-++	48.7	0.00114178	0.000748903	0.1274	+++	53.7	0.00293966	0.00515944	0.5688	-++	73.5	0.0069848	0.00950633	0.4625	+--	0	0.00104368	0.000924628	0.259	+++	17.9	0.000567355	0.00146845	0.6992	-++	0
cg13721560	fully adjusted GI - overweight mothers	chr2	44222568	LRPPRC	no	no	-0.00160928	0.00549566	0.7697	+--	0	0.000183878	0.000984875	0.8519	+-+	15.9	0.000268638	0.00620589	0.9655	++-	0	-0.00263057	0.0132718	0.8429	+--	61.8	0.000390031	0.00111711	0.727	+-+	0	-0.00211142	0.00249153	0.3967	--+	0
cg13740771	fully adjusted GI - overweight mothers	chr20	3026904	MRPS26	no	no	-0.00773024	0.00865862	0.372	---	0	-0.00246877	0.00148848	0.0972	--+	0	-0.01005	0.0101292	0.3211	---	0	-0.00979751	0.0197975	0.6207	-+-	7	-0.00322974	0.00171651	0.05989	--+	0	0.000666955	0.00324345	0.8371	++-	0
cg15225042	fully adjusted GI - overweight mothers	chr19	13044582	FARSA	no	no	-0.00267372	0.00672783	0.6911	-++	0	5.98421e-05	0.00116593	0.9591	-++	32.4	-0.00303501	0.00720031	0.6734	-++	0	-0.00399008	0.0148565	0.7883	-++	43.2	-0.00085743	0.00123659	0.4881	-++	5.4	0.00677904	0.00263919	0.01021	+++	0
cg16031283	fully adjusted GI - overweight mothers	chr22	20861701	MED15	no	no	-0.00370502	0.00750586	0.6216	-++	0	0.00016226	0.00133552	0.9033	-+-	60.7	-0.00467209	0.00821843	0.5697	-++	0	0.00498522	0.0192353	0.7955	++-	0	0.000274567	0.0014662	0.8515	-+-	65.2	0.000115396	0.00337713	0.9727	-+-	0
cg16169361	fully adjusted GI - overweight mothers	chr8	8751409	MFHAS1	yes	no	0.00272745	0.00741437	0.713	++-	0	0.000546269	0.00130755	0.6761	++-	0	0.00752748	0.00810505	0.353	++-	0	-0.0212306	0.0172956	0.2196	-+-	0	0.000980828	0.00146205	0.5023	+++	0	0.00291293	0.00264215	0.2703	+-+	0
cg16604801	fully adjusted GI - overweight mothers	chr17	2718310	RAP1GAP2	no	no	0.00604814	0.00601073	0.3143	+++	0	0.000873933	0.00103711	0.3994	-++	0	0.00130152	0.00682313	0.8487	+-+	0	0.013107	0.0148797	0.3784	+++	0	-0.000235233	0.00116826	0.8404	-++	0	0.00324676	0.00242021	0.1798	++-	58
cg17582259	fully adjusted GI - overweight mothers	chr17	33288330	CCT6B	no	no	0.00591242	0.00956262	0.5364	++-	73.3	0.0015151	0.00165662	0.3604	++-	0	0.00734782	0.010021	0.4634	++-	77.5	-0.0284344	0.0255314	0.2654	-+-	0	0.000828223	0.00179921	0.6453	++-	49.2	0.00634113	0.00407244	0.1195	+++	0
cg18202627	fully adjusted GI - overweight mothers	chr2	200776533	C2orf69	no	no	0.00455026	0.00629753	0.47	+++	0	-0.00097501	0.00113533	0.3905	-++	0	0.00162353	0.00712141	0.8197	-++	0	0.0113204	0.0155559	0.4668	+++	0	-0.00224277	0.00123512	0.0694	---	0	0.00806041	0.00253181	0.001454	+++	0
cg18211447	fully adjusted GI - overweight mothers	chr14	102771717	MOK	no	no	-0.00913121	0.00840205	0.2771	+--	27	4.32429e-05	0.00139871	0.9753	+--	37.3	-0.011714	0.00914126	0.2	+--	64.7	0.0189992	0.0162565	0.2425	++-	0	0.00112237	0.00153548	0.4648	+-+	48	-0.00242739	0.00298953	0.4168	+--	0
cg18290075	fully adjusted GI - overweight mothers	chr3	153840477	ARHGEF26	no	yes	0.0108713	0.0102603	0.2894	+++	0	0.000231042	0.00182594	0.8993	+--	0	0.0065071	0.0109726	0.5532	-++	41.5	0.00262432	0.0299346	0.9301	++-	0	0.000434233	0.00203598	0.8311	+--	45.2	-0.00547859	0.0053099	0.3022	-+-	0
cg20927656	fully adjusted GI - overweight mothers	chr12	7863229	DPPA3	yes	yes	0.227992	0.135286	0.09194	+?-	61.8	0.00942406	0.0260253	0.7173	+?+	0	0.208496	0.153145	0.1734	+?-	45.1	0.503811	0.248362	0.04251	+?-	28.9	-0.00611726	0.0296188	0.8364	-?+	0	0.129946	0.0460421	0.004768	+?+	0
cg23347399	fully adjusted GI - overweight mothers	chr5	140766911	PCDHGA1	no	yes	-0.146192	0.0549941	0.007853	---	0	-0.00336439	0.00863379	0.6968	+--	47.8	-0.213668	0.0627964	0.0006676	---	0	-0.0452728	0.114392	0.6923	+--	0	-0.00789832	0.00992942	0.4264	+--	0	-0.0115299	0.0169093	0.4953	+--	76.3
cg24340911	fully adjusted GI - overweight mothers	chr17	5342028	C1QBP	no	no	-0.00890296	0.00715037	0.2131	-+-	0	0.000141678	0.00120212	0.9062	+--	0	-0.0064646	0.0077454	0.4039	-+-	27.8	-0.00628444	0.0137874	0.6485	---	0	-2.72433e-05	0.00134148	0.9838	+-+	0	0.00374323	0.00217199	0.08481	++-	30.5
cg24458009	fully adjusted GI - overweight mothers	chr12	47472775	AMIGO2	yes	yes	-0.0320153	0.0212304	0.1316	--+	0	-0.00232853	0.00374229	0.5338	--+	0	-0.036795	0.0240694	0.1263	--+	0	-0.0048842	0.044468	0.9125	+--	11.5	-0.00140871	0.00410477	0.7315	--+	0	-0.0033005	0.00748752	0.6594	---	0
cg24688926	fully adjusted GI - overweight mothers	chr19	6737877	GPR108	no	no	0.00126429	0.00597454	0.8324	+--	0	-0.000986418	0.00102184	0.3344	-+-	0	0.000476846	0.00696113	0.9454	+--	0	0.0123482	0.0123889	0.3189	++-	38.3	-0.00107917	0.00122333	0.3777	-+-	0	0.0055324	0.00216036	0.01044	+++	0
cg25832796	fully adjusted GI - overweight mothers	chr14	24038103	JPH4	yes	yes	-0.0330427	0.0250866	0.1878	---	0	-0.00597019	0.00361404	0.09855	---	0	-0.0493262	0.0264572	0.06227	---	0	-0.0382611	0.0579462	0.5091	--+	0	-0.00555905	0.00406034	0.171	---	0	-0.00651887	0.00865252	0.4512	---	0
cg26474288	fully adjusted GI - overweight mothers	chr3	98451287	ST3GAL6-AS1	no	no	0.0136981	0.00883678	0.1211	++-	0	0.0023028	0.00151876	0.1295	+++	0	0.0213851	0.00998712	0.03225	++-	37.2	-0.0192132	0.0240227	0.4238	---	0	0.0013938	0.00173243	0.4211	++-	0	0.00486722	0.00396506	0.2196	+++	0
cg26985201	fully adjusted GI - overweight mothers	chr3	197517876	LRCH3	no	no	-0.000441429	0.007782	0.9548	-++	0	-0.000638678	0.00131265	0.6266	--+	15.9	-0.00348814	0.00838771	0.6775	--+	0	-0.00137182	0.0159435	0.9314	-++	14.4	-0.0019756	0.00147745	0.1812	--+	10.1	0.00491902	0.00297197	0.0979	+++	0
cg27193519	fully adjusted GI - overweight mothers	chr16	4714443	MGRN1	yes	yes	0.0216275	0.0312565	0.489	+-+	0	0.00469894	0.00496093	0.3435	+++	0	0.0381688	0.0343222	0.2661	+++	0	-0.096929	0.0644243	0.1324	--+	0	0.00595851	0.00548622	0.2774	+-+	21.3	0.00871109	0.0112449	0.4385	++-	0
cg09874107	fully adjusted GL - all mothers	chr3	184870896	C3orf70	no	no	-0.00117355	0.0029478	0.6905	+--	0	0.000489892	0.000544344	0.3681	++-	0	-0.00276834	0.00326875	0.397	---	24.9	0.00791509	0.00600902	0.1878	+++	0	0.000764653	0.000612887	0.2122	+-+	0	0.000121147	0.00108868	0.9114	++-	49.6
cg27528695	fully adjusted GL - all mothers	chr1	109643479	SCARNA2	yes	yes	0.0126242	0.0133727	0.3452	+++	0	0.0014644	0.00244505	0.5492	++-	49.2	0.0117508	0.0142731	0.4103	+-+	0	0.0313194	0.0331612	0.3449	+--	0	0.00431432	0.00264381	0.1027	+-+	0	-0.0090053	0.00586961	0.125	++-	81.4
cg02920421	fully adjusted GL - normal weight mothers	chr1	32572534	KPNA6	yes	no	0.0188794	0.0260614	0.4688	++-	33.7	-0.000304461	0.00407978	0.9405	++-	32.9	0.0360693	0.0304702	0.2365	+++	0	0.0423009	0.0589011	0.4727	+++	0	-7.24897e-05	0.00482909	0.988	-+-	0	0.0144793	0.00850996	0.08886	+++	10
cg26729101	fully adjusted GL - normal weight mothers	chr16	229500	HBQ1	yes	no	0.000563553	0.0211838	0.9788	++-	0	-0.00148029	0.00331455	0.6552	-+-	0	-0.0108062	0.023218	0.6416	-+-	0	-0.00954954	0.0478263	0.8417	---	0	-0.00566761	0.00365741	0.1212	---	31.3	0.0116982	0.00713413	0.1011	+++	0
cg03223949	fully adjusted GL - overweight mothers	chr20	60397915	CDH4	yes	yes	0.0341579	0.0225326	0.1295	+++	0	0.00987054	0.00321536	0.002142	+++	0	0.026528	0.0261169	0.3098	-++	0	0.0692799	0.0457348	0.1298	++-	0	0.0097106	0.0037608	0.009821	+++	26.6	0.0106379	0.00682188	0.1189	++-	64.3
cg05111873	fully adjusted GL - overweight mothers	chr17	48450072	MRPL27	yes	no	-0.00418317	0.0217732	0.8476	+?-	0	0.00538553	0.00357076	0.1315	-?+	72.3	-0.0126409	0.0241889	0.6013	-?-	0	-0.042116	0.0502871	0.4023	-?-	0	0.00134559	0.00418897	0.748	-?+	45.9	0.0166406	0.00730142	0.02266	+?+	30.3
cg09480470	fully adjusted GL - overweight mothers	chr12	124556975	ZNF664-RFLNA	no	yes	0.028452	0.0427103	0.5053	+?-	32.7	0.018577	0.00827365	0.02475	+?-	61.4	0.0611769	0.0481193	0.2036	+?-	55.8	-0.13861	0.0912345	0.1287	-?-	0	0.0181929	0.00938694	0.05261	+?-	81.4	0.00533763	0.0166714	0.7488	-?+	0
cg23345004	fully adjusted GL - overweight mothers	chr18	44526430	KATNAL2	no	yes	0.00737573	0.0492889	0.881	+-+	57.6	-0.0120352	0.00700467	0.08577	+--	0	0.0282048	0.056565	0.618	+-+	2.5	0.0901383	0.100007	0.3674	+-+	80.6	-0.00554106	0.00852459	0.5157	--+	0	-0.0209473	0.0143436	0.1442	+--	65.9
cg25044186	fully adjusted GL - overweight mothers	chr6	170494475	LOC154449	yes	yes	-0.00603415	0.0194333	0.7562	+--	0	-0.00381192	0.0028715	0.1843	---	0	0.00225964	0.0214906	0.9163	+-+	0	-0.0593393	0.0351846	0.0917	+--	33.4	-0.000799458	0.00333499	0.8105	--+	40.6	-0.00724299	0.00485347	0.1356	-+-	0
CpG: cytosine-phosphate-guanine site. Chr: chromosome. mQTL: methylation quantitative trait locus. SE: standard error. # Effect size and SE are presented as percentage change in DNA methylation per 1-point increase in glycemic index or load. Bold and underlined are the results that reached P<0.0012, but these were not persistent findings. These Bonferroni significant associations were observed in…

## Sheet: ST10. Lookup adolescence
Supplementary Table 10. Meta-analysis results for associations between maternal glycemic index and glycemic load during pregnancy and methylation level in adolescence (n=711, ALSPAC (17.1y)).
CpG information							A) fully adjusted GI			B) fully adjusted GL			C) fully adjusted GI - mothers with normal weight			D) fully adjusted GI - mothers with overweight or obesity			E) fully adjusted GL - mothers with normal weight			F) fully adjusted GL - mothers with overweight or obesity
CpG	Bonferroni significant in which model?	Chromosome	Position	Nearest Gene	Polymorphic	mQTL	Effect#	SE#	P value	Effect#	SE#	P value	Effect#	SE#	P value	Effect#	SE#	P value	Effect#	SE#	P value	Effect#	SE#	P value
cg21301148	fully adjusted GI - all mothers AND fully adjusted GI - normal weight mothers	chr14	23878195	MYH6	yes	no	0.0427632	0.0484122	0.37738	0.00481659	0.00958983	0.615648	0.0324573	0.0550754	0.555886	0.0649873	0.113992	0.569968	0.000853261	0.0109211	0.937754	0.00638852	0.0230328	0.782108
cg02079551	fully adjusted GI - normal weight mothers	chr10	107023377	SORCS3	yes	no	0.00502001	0.030834	0.870719	0.00204272	0.00615666	0.740151	0.0182005	0.0333389	0.585342	0.0196378	0.0834571	0.814495	0.00668521	0.00660154	0.311664	-0.016809	0.0155846	0.2836
cg00006032	fully adjusted GI - overweight mothers	chr14	66974439	GPHN	no	no	0.000758403	0.0139709	0.956725	0.00308819	0.00283676	0.276703	0.00873373	0.0154486	0.572073	-0.0430906	0.0360234	0.234633	0.00502166	0.003012	0.0960405	-0.0088918	0.0072181	0.221067
cg00367659	fully adjusted GI - overweight mothers	chr17	33288544	ZNF830	no	no	0.00255112	0.0124448	0.837637	0.00158209	0.00248098	0.523894	-0.000249475	0.0137397	0.98552	-0.0180788	0.0274888	0.512351	0.000997136	0.00268597	0.710603	-0.00120374	0.00604245	0.842525
cg01078248	fully adjusted GI - overweight mothers	chr7	123197661	NDUFA5	no	no	-0.00236163	0.00854667	0.782386	-0.000696088	0.00172724	0.687071	0.000123942	0.00989895	0.990015	-0.0337232	0.0196729	0.0898585	-0.000237798	0.00194508	0.902741	-0.00516914	0.00382801	0.180216
cg02725014	fully adjusted GI - overweight mothers	chr5	78809520	HOMER1	no	no	0.0061601	0.0100618	0.540594	0.000170395	0.00200072	0.932154	0.00189076	0.0119544	0.874386	0.0131067	0.0222669	0.557528	0.000289301	0.00233641	0.901501	-0.00153379	0.00432687	0.723773
cg04351062	fully adjusted GI - overweight mothers	chr12	24717058	SOX5	no	yes	0.0087019	0.0129908	0.503184	-0.000915626	0.0026338	0.728216	0.0192584	0.0141819	0.175041	-0.0262677	0.0336374	0.436839	-0.00110466	0.00280862	0.694246	-0.00521544	0.00691147	0.452391
cg06171242	fully adjusted GI - overweight mothers	chr6	24667490	ACOT13	no	no	0.000434835	0.00531536	0.934825	-0.000345114	0.00105563	0.743827	-0.000555533	0.00568823	0.922236	0.00705118	0.0144294	0.626252	-0.000100225	0.00111587	0.928465	-0.000807196	0.00265204	0.761542
cg06591466	fully adjusted GI - overweight mothers	chr14	96505869	C14orf132	no	no	-0.00444642	0.0128619	0.729672	-0.00435505	0.00263829	0.0992633	-0.00842276	0.0144434	0.560029	0.0211395	0.028042	0.452822	-0.00466313	0.00293271	0.112403	-0.00377865	0.00524167	0.472768
cg07254608	fully adjusted GI - overweight mothers	chr8	41997973	AP3M2	no	no	-0.0101615	0.0173058	0.557282	0.002354	0.00343727	0.493676	0.00739737	0.0187532	0.693395	-0.0786928	0.0445614	0.0806516	0.00479316	0.00366323	0.191266	-0.00584041	0.0103985	0.575684
cg12972275	fully adjusted GI - overweight mothers	chr4	122722461	EXOSC9	yes	no	-0.00252222	0.00368207	0.493587	0.000192205	0.000734209	0.79357	0.0010227	0.00389671	0.793075	-0.0261806	0.0109057	0.0184968	0.000521402	0.000771676	0.499541	-0.00476473	0.0026221	0.0726372
cg13358349	fully adjusted GI - overweight mothers	chr10	71211210	TSPAN15	yes	no	0.0219508	0.010846	0.0433762	-0.00144948	0.0022308	0.516068	0.0292008	0.0119535	0.014884	-0.0218335	0.0315088	0.490058	-0.00209729	0.00242	0.38651	-0.00115555	0.00640053	0.857118
cg13445358	fully adjusted GI - overweight mothers	chr12	53661749	ESPL1	yes	no	0.00208242	0.00379492	0.583371	0.000298896	0.000751817	0.691079	0.00296382	0.00422163	0.482947	-0.00322921	0.0104683	0.758433	0.000527929	0.000829281	0.524648	-0.00166648	0.00212845	0.435706
cg13721560	fully adjusted GI - overweight mothers	chr2	44222568	LRPPRC	no	no	-0.00130346	0.00719348	0.856265	-0.000573116	0.00147235	0.697214	0.00113138	0.00807437	0.888617	-0.0451559	0.0230001	0.0526309	0.000280896	0.00158999	0.859837	-0.00538344	0.00496203	0.280787
cg13740771	fully adjusted GI - overweight mothers	chr20	3026904	MRPS26	no	no	-0.00686948	0.0107588	0.523363	-0.00150006	0.0021679	0.489211	-0.00419309	0.0119045	0.724803	-0.0305695	0.0296955	0.305917	-0.00175033	0.00233081	0.453003	-0.00124283	0.00557318	0.824018
cg15225042	fully adjusted GI - overweight mothers	chr19	13044582	FARSA	no	no	-0.002497	0.00876984	0.775942	-0.00248356	0.00180805	0.170017	-0.00150833	0.00995983	0.879683	-0.0183111	0.0173182	0.293068	-0.0022685	0.00195556	0.246542	-0.0107289	0.00377685	0.00551837
cg16031283	fully adjusted GI - overweight mothers	chr22	20861701	MED15	no	no	0.0101323	0.0098244	0.302752	0.00192322	0.00194689	0.323582	0.0139977	0.0109962	0.20357	0.0141893	0.0243971	0.562246	0.00318852	0.00212886	0.134769	-0.00132391	0.00459246	0.773774
cg16169361	fully adjusted GI - overweight mothers	chr8	8751409	MFHAS1	yes	no	0.00167962	0.0120556	0.889236	-0.00373926	0.00239363	0.118715	0.012094	0.0138459	0.382787	-0.0621231	0.030499	0.0444724	-0.00232	0.00269645	0.389948	-0.0188832	0.00521494	0.000475362
cg16604801	fully adjusted GI - overweight mothers	chr17	2718310	RAP1GAP2	no	no	0.00130287	0.00738772	0.860067	0.00144535	0.00148974	0.332295	0.00504291	0.0081107	0.534357	-0.0467352	0.0229648	0.0446881	0.00201815	0.00166195	0.225144	-0.00811979	0.00431089	0.0627489
cg17582259	fully adjusted GI - overweight mothers	chr17	33288330	CCT6B	no	no	-0.010792	0.0103616	0.297995	0.00154201	0.00207544	0.457751	-0.0057962	0.0118387	0.624615	-0.0251907	0.0231621	0.279559	0.00331687	0.00228412	0.147031	-0.00605358	0.0046994	0.200851
cg18202627	fully adjusted GI - overweight mothers	chr2	200776533	C2orf69	no	no	-0.00773938	0.00747545	0.300896	-0.00132583	0.00145733	0.363271	-0.00760703	0.00828787	0.3591	-0.0217589	0.0182036	0.234974	-0.00100595	0.0016217	0.535314	-0.00416698	0.00358315	0.247797
cg18211447	fully adjusted GI - overweight mothers	chr14	102771717	MOK	no	no	0.0162602	0.0123409	0.18809	0.00301549	0.00245174	0.219148	0.0192002	0.0136831	0.161118	-0.00775419	0.0308676	0.802208	0.00530663	0.00266872	0.0472558	-0.00646265	0.00613286	0.294715
cg18290075	fully adjusted GI - overweight mothers	chr3	153840477	ARHGEF26	no	yes	-0.00108855	0.0145128	0.940233	-0.00378128	0.00287128	0.188324	-0.0106643	0.0152119	0.483578	-0.0127655	0.031299	0.684381	-0.00493256	0.00293666	0.0936119	-0.00396538	0.00716443	0.581353
cg20927656	fully adjusted GI - overweight mothers	chr12	7863229	DPPA3	yes	yes	0.211009	0.132873	0.11274	0.0139648	0.027167	0.607395	0.139883	0.153572	0.362764	1.07214	0.322725	0.00127335	-0.013991	0.0303934	0.645461	0.263323	0.0563157	9.7732e-06
cg23347399	fully adjusted GI - overweight mothers	chr5	140766911	PCDHGA1	no	yes	-0.188734	0.0830891	0.0234314	-0.0306901	0.0164251	0.0621255	-0.26432	0.0916132	0.00406508	0.0592772	0.1995	0.767024	-0.0347075	0.0179609	0.0538232	0.00724686	0.0415413	0.861887
cg24340911	fully adjusted GI - overweight mothers	chr17	5342028	C1QBP	no	no	0.0170328	0.00950416	0.0735603	-0.000641876	0.00189902	0.735465	0.0227394	0.0103822	0.0289304	-0.0365721	0.0225122	0.107606	0.000488112	0.0020561	0.812438	-0.0054241	0.00471273	0.252673
cg24458009	fully adjusted GI - overweight mothers	chr12	47472775	AMIGO2	yes	yes	-0.00475809	0.0267892	0.859081	0.0015827	0.00541416	0.770128	0.00387805	0.0291569	0.894237	-0.0366455	0.0725126	0.614564	-7.7858e-05	0.00573082	0.989165	0.000204032	0.014018	0.98842
cg24688926	fully adjusted GI - overweight mothers	chr19	6737877	GPR108	no	no	-0.00384347	0.00845824	0.649683	0.000398551	0.00170637	0.815392	-0.00527207	0.00939756	0.575025	0.00386933	0.0210619	0.854635	0.00030166	0.00188489	0.872908	0.00623753	0.00398143	0.120555
cg25832796	fully adjusted GI - overweight mothers	chr14	24038103	JPH4	yes	yes	-0.0386772	0.0579791	0.504943	0.0100532	0.0113392	0.375613	-0.00194593	0.0606883	0.974432	-0.184417	0.147301	0.213718	0.00959262	0.012072	0.427178	0.00691928	0.0265207	0.794745
cg26474288	fully adjusted GI - overweight mothers	chr3	98451287	ST3GAL6-AS1	no	no	-0.000357859	0.0128582	0.977805	0.000809797	0.00255639	0.751513	-0.000724275	0.0139415	0.958587	-0.00264953	0.0304591	0.930867	0.0018149	0.00278002	0.514134	-0.0106378	0.00573998	0.0669766
cg26985201	fully adjusted GI - overweight mothers	chr3	197517876	LRCH3	no	no	-0.00820401	0.0109459	0.453814	-0.00153811	0.00219177	0.483067	-0.0111163	0.0121522	0.360721	0.0215448	0.0249857	0.390726	-0.00189015	0.00241066	0.433332	-0.00470832	0.00501855	0.350554
cg27193519	fully adjusted GI - overweight mothers	chr16	4714443	MGRN1	yes	yes	-0.0123073	0.0433308	0.776473	0.0108328	0.00866158	0.211487	-0.0117451	0.0479371	0.80654	-0.174357	0.128825	0.179161	0.0104838	0.00961585	0.276076	0.0199663	0.0279202	0.476307
cg09874107	fully adjusted GL - all mothers	chr3	184870896	C3orf70	no	no	-0.00392639	0.00311448	0.207857	0.000680259	0.000625212	0.276963	-0.00342081	0.00362204	0.345359	0.00230936	0.00694371	0.740197	0.00122758	0.000704808	0.082117	0.000133008	0.00141111	0.925107
cg27528695	fully adjusted GL - all mothers	chr1	109643479	SCARNA2	yes	yes	-0.00120825	0.0126235	0.923776	-0.000212548	0.00254328	0.933422	-0.0122778	0.0144169	0.394801	0.0114573	0.0335566	0.733573	-0.000436768	0.00281262	0.876652	-0.0022106	0.00688734	0.74898
cg02920421	fully adjusted GL - normal weight mothers	chr1	32572534	KPNA6	yes	no	0.0291782	0.0422912	0.490471	0.000332401	0.00838478	0.968389	0.0274331	0.0453106	0.545133	0.0382501	0.108481	0.725188	-5.40732e-05	0.00880423	0.995102	-0.00358077	0.0220688	0.871457
cg26729101	fully adjusted GL - normal weight mothers	chr16	229500	HBQ1	yes	no	-0.00652269	0.0295475	0.825352	0.00197137	0.00587199	0.737183	-0.0227256	0.0329484	0.490654	0.109423	0.0698695	0.120683	3.92865e-05	0.00641429	0.995115	0.00457037	0.0148105	0.758316
cg03223949	fully adjusted GL - overweight mothers	chr20	60397915	CDH4	yes	yes	0.0279293	0.0574829	0.627216	-0.00645476	0.0118277	0.585431	0.0565163	0.0635218	0.374007	-0.0676214	0.151938	0.657311	-0.00846946	0.0127903	0.508132	-0.00141757	0.0306006	0.963151
cg05111873	fully adjusted GL - overweight mothers	chr17	48450072	MRPL27	yes	no	-0.0353565	0.0301762	0.241746	-0.00850479	0.00603977	0.159556	-0.0609211	0.034068	0.0742968	-0.0738733	0.0734959	0.317439	-0.007879	0.00658748	0.232195	-0.0183856	0.0151517	0.228033
cg09480470	fully adjusted GL - overweight mothers	chr12	124556975	ZNF664-RFLNA	no	yes	-0.0267086	0.0421626	0.526643	-0.00940397	0.00829907	0.257559	-0.0497999	0.0491569	0.311468	-0.0436647	0.0914801	0.634246	-0.0148357	0.00965167	0.124842	-0.00757172	0.0169594	0.65629
cg23345004	fully adjusted GL - overweight mothers	chr18	44526430	KATNAL2	no	yes	-0.222946	0.107613	0.0386678	0.0125249	0.021885	0.567305	-0.310778	0.118828	0.00915779	-0.0979789	0.287918	0.734397	0.00400775	0.0237397	0.866	0.0271282	0.0552115	0.624336
cg25044186	fully adjusted GL - overweight mothers	chr6	170494475	LOC154449	yes	yes	-0.0109599	0.0493457	0.824302	-0.00827107	0.00948511	0.383523	-0.0151586	0.0546339	0.781536	0.0141454	0.123683	0.909203	-0.00805135	0.0103215	0.4357	-0.0239149	0.0228027	0.29712
CpG: cytosine-phosphate-guanine site. Chr: chromosome. mQTL: methylation quantitative trait locus. SE: standard error. # Effect size and SE are presented as percentage change in DNA methylation per 1-point increase in glycemic index or load. Bold and underlined are the results that reached P<0.0012, but these were not persistent findings. These Bonferroni significant associations were observed in…

## Sheet: ST11. Lookup_previousEWAS
Supplementary Table 11. Lookup in previously published EWAS on maternal late-pregnancy glycemic traits, maternal early-pregnancy blood glucose and insuline concentrations and maternal early-pregnancy BMI.
																	Maternal early-pregnancy blood glucose concentrations												Maternal early-pregnancy blood insulin concentrations																Childhood body mass index
	Late-pregnancy fasting glucose				Late-pregnancy fasting insulin				Late-pregnancy oral glucose tolerance test				Maternal early-pregnancy BMI				All mothers				Mothers with normal weight				Mothers with overweight				All mothers				Mothers with normal weight				Mothers with overweight				Birthweight				Early childhood BMI (2-5y)				Late childhood BMI (5-10y)
probeID	Effect	StdErr	P-value		Effect	StdErr	P-value		Effect	StdErr	P-value		Effect	StdErr	P-value		Effect	StdErr	P-value		Effect	StdErr	P-value		Effect	StdErr	P-value		Effect	StdErr	P-value		Effect	StdErr	P-value		Effect	StdErr	P-value		Effect	StdErr	P-value		Effect	StdErr	P-value		Effect
cg00006032	0.000806573	0.00042656	0.0586408		0.000401515	0.000370207	0.278113		-2.04549e-07	1.9324e-06	0.9157		-4.19268e-06	2.54055e-05	0.8689		0.000249156	0.000645238	0.699388		0.000518759	0.000736199	0.481032		-0.000703325	0.00154214	0.64834		-9.32734e-05	0.000598421	0.876139		-0.000282414	0.000675774	0.676012		0.000283137	0.00169081	0.867011		-9.71323	26.009	0.7088		-1.0173	1.1212	0.3643		0.2253
cg00367659	0.000571714	0.000387161	0.13976		0.000628536	0.0004524	0.164731		1.58085e-06	1.61661e-06	0.328134		4.00848e-06	2.73355e-05	0.8834		0.00047128	0.00063082	0.455009		0.00088222	0.000679901	0.194435		8.9898e-05	0.00176224	0.959315		0.000356323	0.000582846	0.540968		0.000652899	0.000648611	0.314122		0.000121584	0.00138621	0.930108		1.89486	25.7868	0.9414		1.181	0.9351	0.2066		1.1391
cg01078248	0.000280034	0.000269115	0.298074		-0.000126108	0.000222214	0.570368		6.47862e-07	1.07811e-06	0.547889		-2.70292e-05	1.44071e-05	0.06064		0.000598648	0.000502732	0.233736		0.00123425	0.000609559	0.0428858		-0.000801614	0.00111462	0.47203		0.000227456	0.000451252	0.614223		0.000329587	0.000546398	0.546375		-0.000383814	0.00106739	0.719161		18.5941	40.5109	0.6462		-0.2575	1.5775	0.8703		-1.177
cg02079551	0.000859892	0.000441415	0.0514107		0.00080749	0.000499894	0.106241		5.07849e-07	1.55795e-06	0.744445		2.14002e-05	3.67265e-05	0.5601		-0.00208477	0.00079202	0.00848284		-0.00175435	0.000882571	0.0468372		-0.00239152	0.00163307	0.143075		-0.000675852	0.000665274	0.309676		-0.000242206	0.000809364	0.764746		-0.00146611	0.00127559	0.25041		-53.3888	19.6136	0.006488		0.4916	0.8366	0.5568		0.4938
cg02725014	0.000462192	0.000287727	0.108195		0.000313021	0.000302686	0.301068		2.51367e-06	1.21249e-06	0.0381591		-4.63993e-05	2.2167e-05	0.03633		0.000242182	0.000559702	0.665234		-1.48728e-05	0.000641264	0.981496		0.000982491	0.00147033	0.504		0.000442169	0.000503431	0.379775		4.28953e-05	0.00058419	0.941466		0.00123796	0.00122684	0.312947		15.1783	35.1004	0.6654		1.0074	1.292	0.4356		0.2123
cg02920421	5.02962e-05	0.000850512	0.952843		0.000465073	0.000489515	0.342077		2.00094e-06	3.46637e-06	0.563774		6.29031e-05	6.12905e-05	0.3047		-0.000229583	0.00127947	0.857595		0.000170157	0.00159696	0.915145		-0.00521175	0.00211419	0.0136963		0.000593274	0.00107722	0.58181		0.00145579	0.00130924	0.266164		-0.00382845	0.00232423	0.0995195		2.90932	11.4902	0.8001		0.1113	0.542	0.8373		-0.4633
cg03223949	0.00012703	0.000732675	0.862354		-8.56576e-05	0.000540407	0.874058		2.21065e-06	3.72218e-06	0.552571		-6.00716e-05	4.89199e-05	0.2195		0.000290281	0.000704543	0.68033		-0.000289491	0.000859662	0.736306		0.000324865	0.00160304	0.839404		-0.000381895	0.000624395	0.540787		-0.000725331	0.000693866	0.295863		0.00162144	0.00146747	0.269193		-21.9544	15.6779	0.1614		-0.2701	0.677	0.6899		0.5088
cg04351062	-0.000553337	0.000271897	0.0418411		-0.000114289	0.000255741	0.654952		-1.95342e-06	9.05369e-07	0.0309593		-6.06245e-05	3.08264e-05	0.04922		-0.00100504	0.000709783	0.156782		-0.000806457	0.000793871	0.309699		-0.00215123	0.00158254	0.174036		-0.00049396	0.000664716	0.457413		-0.000546253	0.000774008	0.480347		-0.000884425	0.00139686	0.526634		56.5496	23.761	0.01732		-0.38	0.9794	0.698		0.7303
cg05111873	-0.000165198	0.000422211	0.695598		0.000620814	0.000461737	0.178781		-1.51444e-06	1.38839e-06	0.275364		-0.000139128	7.55644e-05	0.06559		-	-	-		-	-	-		-	-	-		-	-	-		-	-	-		-	-	-		0.51813	13.2483	0.9688		0.7725	0.4258	0.06965		0.4937
cg06171242	0.000404947	0.000275311	0.141326		-0.000113199	0.000293946	0.700162		1.72361e-06	1.10422e-06	0.118543		-3.48926e-06	1.3194e-05	0.7914		-0.000109045	0.000313496	0.727964		-0.000277432	0.000355504	0.435162		-0.000489148	0.00051474	0.341969		0.000257222	0.00027381	0.347515		0.000113517	0.000331239	0.731821		9.14857e-05	0.000518807	0.860028		-23.8673	51.7142	0.6444		2.7213	2.4029	0.2574		3.585
cg06591466	0.000136164	0.000328799	0.678783		-0.000199933	0.000222109	0.368038		-1.07295e-06	1.37288e-06	0.434487		-5.49711e-05	2.11037e-05	0.009193		0.000426605	0.000586783	0.467212		0.000976029	0.000689919	0.157156		-0.00125629	0.00120635	0.297694		-0.000238659	0.000561755	0.67095		-0.000358793	0.000667913	0.591139		0.000108033	0.00144471	0.940391		19.1098	35.5996	0.5914		-0.6916	1.2225	0.5716		-0.133
cg07254608	5.75588e-05	0.000456758	0.899719		-0.000443906	0.000359509	0.216922		-4.47021e-07	2.14196e-06	0.834685		-8.52818e-06	2.73504e-05	0.7552		0.000135529	0.000749613	0.856526		0.00124618	0.000884307	0.158772		-0.00377515	0.00135229	0.00524361		-0.000352984	0.000632651	0.576882		-7.01536e-05	0.000753932	0.925864		-0.00179816	0.00122189	0.141123		19.1245	31.3683	0.5421		-0.5144	1.3012	0.6926		-2.0342
cg09480470	-0.00324128	0.00220529	0.141623		-0.00198437	0.00123532	0.108195		1.65804e-06	1.3092e-05	0.899221		2.23115e-05	0.000129638	0.8634		-	-	-		-	-	-		-	-	-		-	-	-		-	-	-		-	-	-		-13.6867	8.57813	0.1106		-0.0985	0.3601	0.7844		-0.3778
cg09874107	-0.000447264	0.000230684	0.0525189		1.98444e-05	0.00016476	0.904131		6.63976e-07	8.87969e-07	0.454613		2.85025e-05	1.35985e-05	0.03608		-0.000198549	0.000366473	0.587967		-0.000204262	0.000428944	0.633933		-0.000136435	0.00070658	0.846887		0.00015125	0.000294581	0.607643		0.000106622	0.000367699	0.771839		0.000469223	0.000503022	0.350918		80.4844	50.0442	0.1078		-2.5251	2.0059	0.2081		-1.6451
cg12972275	0.000595251	0.000256866	0.0204839		3.08048e-05	0.000811311	0.969712		4.29567e-07	9.73422e-07	0.658999		-3.87709e-06	2.10297e-05	0.8537		-5.66421e-06	0.000345434	0.986917		0.000138307	0.00040997	0.735847		-0.000295067	0.000915608	0.747253		-8.63717e-05	0.000281192	0.75872		-4.21682e-05	0.000324216	0.896517		-3.8139e-05	0.000614323	0.950497		-27.6925	17.9628	0.1232		0.6079	0.7303	0.4052		0.6299
cg13358349	-2.4374e-05	0.000334589	0.941927		1.14727e-06	0.00028549	0.996794		1.06417e-07	1.37197e-06	0.938174		-5.36614e-05	2.5218e-05	0.03335		0.000133436	0.000636421	0.833928		0.000386319	0.000737501	0.600403		-0.00106963	0.00145278	0.461569		-0.000328524	0.000584855	0.574308		-0.000822245	0.000699479	0.23979		0.000926728	0.00138129	0.502276		-25.3635	33.9968	0.4556		0.6963	1.1547	0.5465		1.9168
cg13445358	-1.14756e-06	0.000119277	0.992324		4.9879e-05	0.000186431	0.789048		-6.17032e-07	4.07912e-07	0.130366		-2.44697e-05	1.50829e-05	0.1047		0.000768164	0.000527146	0.145057		0.000622214	0.000622459	0.317501		0.000994102	0.000848878	0.241568		0.000646126	0.000399799	0.106067		0.00084489	0.000468541	0.0713515		0.00037869	0.000971902	0.696804		39.829	25.459	0.1177		1.397	0.8699	0.1083		1.5653
cg13721560	6.28585e-05	0.000123551	0.610917		7.64891e-05	0.000113596	0.500729		-8.82213e-07	4.56019e-07	0.0530395		1.80298e-05	1.48906e-05	0.226		0.000107189	0.000584114	0.8544		0.000161952	0.00066722	0.808217		0.000162666	0.00159292	0.918663		-5.06991e-05	0.000435618	0.907348		-7.2034e-06	0.000515249	0.988846		0.000106459	0.00108144	0.921581		-27.3979	36.1566	0.4486		-0.0466	1.6131	0.977		-0.0252
cg13740771	0.000151979	0.000418881	0.716737		0.000290064	0.000394609	0.462299		-6.7503e-07	1.97599e-06	0.73264		-3.43652e-05	2.55572e-05	0.1787		-0.00029125	0.000659192	0.658613		-0.000309188	0.000741077	0.676522		-0.00052258	0.00165122	0.751637		-0.000141289	0.000566948	0.803198		-0.00046664	0.00066332	0.481749		0.000703175	0.00124915	0.573488		-16.0471	30.0631	0.5935		-0.7702	1.1887	0.5171		-0.3493
cg15225042	0.000470479	0.000316602	0.137272		0.000254641	0.000381988	0.505015		-5.16707e-07	1.23663e-06	0.676068		-6.05966e-06	2.10356e-05	0.7733		5.24678e-05	0.000517828	0.919294		0.000158996	0.000567764	0.779447		0.000513606	0.00122187	0.674234		-0.000198452	0.000413083	0.63093		-0.000268603	0.000461548	0.560593		0.000221926	0.00100441	0.825129		-26.3475	37.5122	0.4824		1.814	1.4501	0.211		0.399
cg16031283	-0.000120493	0.000672775	0.85786		-	-	-		-	-	-		5.80839e-06	2.28513e-05	0.7994		-0.0001597	0.000524173	0.760617		-0.00052766	0.000616695	0.392204		0.000838485	0.00140725	0.551287		0.00047417	0.000448185	0.290066		0.000101372	0.000544022	0.852179		0.00224523	0.00104279	0.0313106		40.6807	37.0106	0.2717		-2.3925	1.6847	0.1556		-1.1864
cg16169361	0.000196355	0.00036061	0.586091		-0.000492946	0.000331504	0.137015		1.56756e-06	1.30569e-06	0.229923		-3.7138e-05	1.97296e-05	0.05979		-0.000550901	0.000507319	0.27752		-0.000536402	0.000550479	0.329845		-0.000914978	0.00122145	0.453802		-0.000168755	0.000400344	0.673372		-0.00047444	0.000445328	0.286708		0.00102572	0.000971382	0.290994		-14.7515	36.9227	0.6895		-1.87	1.6891	0.2682		-0.6356
cg16604801	0.000242223	0.000261742	0.354744		-0.000209905	0.000198916	0.291313		4.9949e-07	9.48324e-07	0.598396		1.77979e-06	1.5385e-05	0.9079		0.00103771	0.0005263	0.0486434		0.00120571	0.000570522	0.0345712		0.000956622	0.00124418	0.441965		0.00027832	0.000467365	0.551504		0.000211992	0.000521669	0.684469		0.000773171	0.00108317	0.475349		21.8387	39.6942	0.5822		-0.1542	1.414	0.9131		0.1796
cg17582259	-0.00101403	0.000595601	0.088656		-0.00012882	0.000198732	0.516851		5.00119e-07	9.40317e-07	0.594822		1.01189e-05	2.26139e-05	0.6545		0.00137109	0.000581653	0.0184122		0.00204865	0.000639518	0.00135801		-0.00100881	0.00130767	0.440435		0.000504271	0.00052384	0.335727		0.000643416	0.000613101	0.293974		-0.000319218	0.0013246	0.809562		-26.3996	35.6718	0.4593		-0.1832	1.1698	0.8755		0.664
cg18202627	0.000121073	0.00023669	0.608984		-	-	-		-	-	-		-3.41261e-05	1.38738e-05	0.0139		0.000242259	0.000525701	0.64492		0.000625256	0.000615784	0.309924		-0.000229036	0.000879033	0.794436		3.66347e-05	0.000417266	0.930038		0.000169234	0.000495933	0.73292		1.2943e-05	0.000987412	0.989542		-29.2095	40.7248	0.4732		1.9802	1.6007	0.2161		2.8594
cg18211447	0.000147096	0.000151567	0.331798		-0.000292185	0.00015367	0.057253		-4.13618e-07	4.89016e-07	0.397655		-5.17909e-05	2.61789e-05	0.04789		0.00035255	0.000696943	0.612961		0.000397241	0.000885284	0.653637		0.000111139	0.00114586	0.922733		-0.000186805	0.00049541	0.70612		-0.000275567	0.000585893	0.638114		0.000739015	0.00103316	0.474426		3.17741	29.7431	0.9149		0.3305	1.2967	0.7988		0.4809
cg18290075	-0.000172707	0.000262539	0.510646		0.000204517	0.00037688	0.587366		-7.20094e-07	1.01477e-06	0.477944		-1.98209e-05	2.77364e-05	0.4748		-0.000724736	0.000766074	0.344129		-0.000216307	0.000825116	0.793203		-0.00299244	0.00219644	0.173071		0.000212835	0.000630284	0.735604		-6.68931e-05	0.000697083	0.923551		0.00115352	0.00188561	0.540705		68.0302	23.1362	0.003278		1.1696	0.8631	0.1754		1.1239
cg20927656	0.0074712	0.00681571	0.273003		0.00546032	0.00480046	0.255347		2.78377e-05	3.09485e-05	0.368394		-9.14957e-05	0.000340515	0.7882		-	-	-		-	-	-		-	-	-		-	-	-		-	-	-		-	-	-		0.83097	3.00893	0.7824		0.1823	0.1197	0.1279		0.1229
cg21301148	-0.000543144	0.000962687	0.572621		-0.000475949	0.000662348	0.472401		1.61499e-06	5.91613e-06	0.784867		-0.000119785	6.1232e-05	0.05044		0.000304313	0.000985118	0.757389		-0.000170551	0.00115145	0.882249		0.00198314	0.00171556	0.247692		-0.000990088	0.000790255	0.210252		-0.00153822	0.000944146	0.103267		4.25176e-06	0.00144944	0.99766		-24.2414	12.3751	0.05013		0.0395	0.4665	0.9325		-0.1219
cg23345004	0.0015529	0.00196516	0.429403		0.00134982	0.00125577	0.28242		4.22891e-06	1.062e-05	0.690481		-0.000174178	9.6341e-05	0.07062		0.00310468	0.00200893	0.12224		0.00442276	0.00211043	0.0361119		0.000595184	0.00512711	0.907585		0.000801719	0.00161622	0.619862		0.00265965	0.00182543	0.145116		-0.00513835	0.00421964	0.22333		0.4956	10.4164	0.9621		-0.5987	0.4021	0.1365		0.4069
cg23347399	-0.00522037	0.00250814	0.0373999		-0.00103977	0.00167841	0.535586		1.65753e-06	1.2415e-05	0.893789		-0.000315649	0.000112832	0.00515		-0.0029687	0.00234753	0.206013		-0.00330345	0.00260508	0.204769		-0.00244642	0.00429024	0.568523		-0.00027036	0.00198068	0.891427		-0.00118004	0.00226414	0.602235		0.00321018	0.00425648	0.450737		-10.1063	8.62837	0.2415		0.5255	0.3396	0.1218		0.1121
cg24340911	-3.69836e-05	0.000189291	0.845096		-0.000125733	0.000178183	0.48041		2.72058e-08	6.81034e-07	0.968135		5.44101e-07	1.87658e-05	0.9769		0.000855095	0.00056815	0.132311		0.000559774	0.000663858	0.39911		0.0028068	0.00125199	0.0249693		0.000556997	0.000429464	0.194646		0.000450099	0.000510693	0.378129		0.00128168	0.00107077	0.231319		46.7387	40.3216	0.2464		-0.5249	1.8333	0.7746		0.8842
cg24458009	-0.00156229	0.00246943	0.526961		-	-	-		-	-	-		4.04083e-05	7.15291e-05	0.5721		0.00329697	0.00157479	0.0362964		0.00237998	0.00168674	0.158245		0.00395941	0.00398088	0.319927		0.00208448	0.0011619	0.0728088		0.00236567	0.00131344	0.0716831		0.000286508	0.00290987	0.921566		16.4588	12.9653	0.2043		-0.2108	0.5424	0.6976		-0.7383
cg24688926	0.000196951	0.000217957	0.366196		0.000274639	0.000188808	0.145782		3.33805e-07	7.33796e-07	0.64918		-1.32276e-05	2.04839e-05	0.5184		0.000140725	0.000459839	0.759582		0.000325428	0.000508941	0.522548		-0.000106718	0.00114474	0.925725		6.63395e-05	0.000461188	0.885623		-0.000361755	0.000562126	0.519868		0.00107579	0.00109478	0.325777		6.76188	26.0636	0.7953		-0.3557	1.2554	0.7769		-0.0829
cg25044186	-0.000245289	0.000515764	0.634371		-0.000796727	0.000459444	0.0828988		-1.21565e-06	1.83677e-06	0.508073		5.63087e-06	3.67061e-05	0.8781		0.0013641	0.000857997	0.111865		0.00133702	0.00100098	0.181645		0.00147386	0.00233275	0.527509		0.000374103	0.000647429	0.56338		0.000274107	0.000753828	0.716141		-0.00064748	0.0019109	0.734734		-15.7384	14.4169	0.275		1.0616	0.628	0.09092		0.166
cg25832796	-0.000365244	0.000870553	0.674811		-0.000392373	0.000677776	0.562649		-2.41467e-06	3.66307e-06	0.509771		-3.17144e-05	5.55118e-05	0.5678		-0.00158203	0.00138172	0.252222		-0.00140245	0.00141384	0.321226		-0.00733697	0.00257535	0.00438681		-0.00105811	0.00113699	0.352051		-0.00114958	0.0012429	0.355009		-0.00435935	0.00290138	0.132966		-21.8927	17.2221	0.2037		-1.3529	0.6516	0.03785		0.2087
cg26474288	0.0006539	0.000464992	0.159647		0.00074903	0.000459877	0.103364		-2.02487e-06	1.94233e-06	0.297181		-3.77916e-05	2.79227e-05	0.1759		0.000693556	0.000608772	0.25459		0.000788035	0.000722935	0.275691		0.000405287	0.00122407	0.740571		0.000234667	0.000515224	0.648774		0.000209991	0.00061041	0.730834		0.000130536	0.000959005	0.89173		-77.9627	31.1751	0.01239		1.53	1.2184	0.2092		-0.0723
cg26729101	-6.95756e-05	0.000969624	0.942797		0.000768342	0.000602912	0.202527		-3.16932e-06	4.4247e-06	0.473818		-2.07052e-05	5.62009e-05	0.7126		-0.000401905	0.000722206	0.577871		4.48815e-05	0.000812871	0.955968		-0.00130085	0.00174332	0.455552		-0.000481659	0.000636752	0.449391		0.000227184	0.00073397	0.756921		-0.00173664	0.00130773	0.184185		1.20403	15.3387	0.9374		0.5709	0.8039	0.4776		-0.4773
cg26985201	-0.000154577	0.000198582	0.436329		0.00019703	0.000166495	0.236651		1.64884e-07	7.12622e-07	0.817022		-1.76868e-05	1.88374e-05	0.3478		0.00089422	0.000609302	0.142209		0.000479107	0.000744708	0.519998		0.00166545	0.00117051	0.154784		0.000244053	0.00047454	0.607047		5.41617e-05	0.000562657	0.923314		1.47713e-05	0.000989229	0.988086		-1.34178	35.7785	0.9701		3.2289	1.5941	0.04281		0.3568
cg27193519	-0.0049116	0.00187093	0.00865944		-0.0020199	0.00135433	0.135847		-9.9187e-06	1.18569e-05	0.402853		2.56086e-05	9.53766e-05	0.7883		0.000538083	0.00139164	0.699012		0.00108016	0.00162626	0.506562		0.0027715	0.00294268	0.34628		0.000132773	0.00126971	0.916717		-0.000757673	0.00153084	0.620643		0.00416725	0.0027304	0.12695		13.802	8.7566	0.115		0.0336	0.3312	0.9192		0.0515
cg27528695	-0.00237664	0.00127735	0.0628004		-0.00109388	0.00092479	0.236874		-9.29504e-06	5.11328e-06	0.0690912		-0.000114783	6.24022e-05	0.06585		-0.00129763	0.00101475	0.200976		-0.000735398	0.00113893	0.518477		-0.00294562	0.00213054	0.166797		-0.000479278	0.000922439	0.603358		-0.00041329	0.0010814	0.702328		-0.000857765	0.00188456	0.648999		26.8323	18.7896	0.1533		-1.1289	0.8263	0.1719		-0.3304
[truncated: 2 more columns]

## Sheet: ST12. Functional enrichment
Supplementary Table 12. Functional enrichment analyses results.
all 41 CpGs from both main models and stratified models ( (CpGs with P<0.0001) only pathways with P<0.01 are presented in this table
ONTOLOGY	TERM	N	DE	P.DE	FDR
MF	beta-galactoside alpha-2,3-sialyltransferase activity	1	1	0.00269573	1
MF	molybdopterin adenylyltransferase activity	1	1	0.00325508	1
MF	molybdopterin molybdotransferase activity	1	1	0.00325508	1
MF	advanced glycation end-product receptor activity	1	1	0.00340715	1
MF	kininogen binding	2	1	0.00486584	1
MF	haptoglobin binding	10	1	0.00745642	1
MF	nitrate reductase activity	3	1	0.00885639	1
CC	phenylalanine-tRNA ligase complex	2	1	0.00554654	1
CC	haptoglobin-hemoglobin complex	11	1	0.00759349	1
BP	regulation of long-term synaptic depression	13	2	0.000732869	1
BP	regulation of mitochondrial translation	26	2	0.00250881	1
BP	visceral muscle development	1	1	0.00281324	1
BP	positive regulation of p38MAPK cascade	30	2	0.00301781	1
BP	protection of DNA demethylation of female pronucleus	1	1	0.00303723	1
BP	molybdenum incorporation into molybdenum-molybdopterin complex	1	1	0.00325508	1
BP	metal incorporation into metallo-molybdopterin complex	1	1	0.00325508	1
BP	glycine receptor clustering	1	1	0.00325508	1
BP	regulation of mitochondrial gene expression	30	2	0.00334664	1
BP	regulation of endothelin production	1	1	0.00340715	1
BP	positive regulation of endothelin production	1	1	0.00340715	1
BP	negative regulation of connective tissue replacement involved in inflammatory response wound healing	1	1	0.00340715	1
BP	negative regulation of connective tissue replacement	1	1	0.00340715	1
BP	endothelin production	1	1	0.00340715	1
BP	regulation of connective tissue replacement involved in inflammatory response wound healing	2	1	0.00343196	1
BP	long-term synaptic depression	30	2	0.00397036	1
BP	negative regulation of mitochondrial RNA catabolic process	2	1	0.00462542	1
BP	phospholipase C-activating G protein-coupled glutamate receptor signaling pathway	2	1	0.00596724	1
BP	entry of viral genome into host nucleus through nuclear pore complex via importin	2	1	0.00599469	1
BP	mitochondrial translation	134	3	0.00637162	1
BP	regulation of p38MAPK cascade	45	2	0.00653984	1
BP	negative regulation of long-term synaptic depression	2	1	0.00670683	1
BP	establishment of synaptic specificity at neuromuscular junction	2	1	0.00673353	1
BP	regulation of interleukin-12 production	51	2	0.00696955	1
BP	heterophilic cell-cell adhesion via plasma membrane cell adhesion molecules	45	2	0.00719274	1
BP	interleukin-12 production	53	2	0.00763288	1
BP	preantral ovarian follicle growth	3	1	0.00841918	1
BP	multi-layer follicle stage	3	1	0.00841918	1
BP	positive regulation of monocyte extravasation	3	1	0.00843131	1
BP	p38MAPK cascade	51	2	0.0084645	1
BP	U1 snRNA 3'-end processing	3	1	0.0085997	1
BP	U5 snRNA 3'-end processing	3	1	0.0085997	1
BP	chromatin reprogramming in the zygote	3	1	0.00879606	1
BP	negative regulation of inflammatory response to wounding	3	1	0.00893715	1
BP	phenylalanyl-tRNA aminoacylation	3	1	0.00917068	1
BP	negative regulation of DNA demethylation	3	1	0.00971543	1
BP	positive regulation of dendritic cell differentiation	4	1	0.00985956	1
BP	homophilic cell adhesion via plasma membrane adhesion molecules	160	3	0.00987199	1
BP	negative regulation of sister chromatid cohesion	3	1	0.00991397	1
GI - all mothers (CpGs with P<0.0001)
ONTOLOGY/KEGG	TERM / KEGG description	N	DE	P.DE	FDR
KEGG	Phototransduction	27	2	0.00285772	0.985912
MF	enzyme activator activity	485	7	0.00106917	1
MF	enzyme regulator activity	983	9	0.00379322	1
MF	N(6)-L-threonylcarbamoyladenine synthase activity	2	1	0.00445437	1
MF	actin binding	412	6	0.00450322	1
MF	actin filament binding	197	4	0.00692188	1
MF	proline-tRNA ligase activity	2	1	0.00773136	1
CC	sarcomere	199	5	0.000602865	1
CC	myofibril	219	5	0.000985327	1
CC	Z disc	123	4	0.00112041	1
CC	contractile fiber	230	5	0.00117615	1
CC	I band	134	4	0.00147085	1
CC	photoreceptor disc membrane	19	2	0.00154902	1
CC	clathrin-coated pit	68	3	0.0017414	1
CC	protein-lipid complex	37	2	0.00471722	1
CC	lipid tube	1	1	0.00549965	1
CC	actin filament	108	3	0.00761317	1
CC	actin cytoskeleton	487	6	0.0084546	1
CC	supramolecular fiber	926	8	0.00871099	1
CC	supramolecular polymer	932	8	0.00907847	1
BP	chylomicron remnant clearance	9	2	0.00038782	1
BP	triglyceride-rich lipoprotein particle clearance	9	2	0.00038782	1
BP	cardiac muscle fiber development	10	2	0.000564744	1
BP	muscle contraction	349	6	0.00127321	1
BP	negative regulation of phosphatidylcholine catabolic process	1	1	0.00145478	1
BP	actin filament-based process	765	9	0.00163695	1
BP	regulation of lipoprotein lipase activity	23	2	0.00225789	1
BP	regulation of rhodopsin mediated signaling pathway	24	2	0.00255865	1
BP	negative regulation of focal adhesion assembly	17	2	0.00273043	1
BP	negative regulation of cell-substrate junction organization	17	2	0.00273043	1
BP	actin cytoskeleton organization	669	8	0.0027657	1
BP	rhodopsin mediated signaling pathway	26	2	0.00301095	1
BP	visceral muscle development	1	1	0.00325171	1
BP	muscle cell development	177	4	0.00333385	1
BP	cell differentiation involved in embryonic placenta development	26	2	0.00379657	1
BP	muscle system process	449	6	0.00411872	1
BP	phototransduction, visible light	31	2	0.00435189	1
BP	positive regulation of actin filament polymerization	96	3	0.00438758	1
BP	focal adhesion assembly	81	3	0.00460769	1
BP	protein-lipid complex assembly	34	2	0.00467782	1
BP	sebum secreting cell proliferation	1	1	0.00473773	1
BP	regulation of hydrolase activity	1222	10	0.00524699	1
BP	regulation of heart rate	100	3	0.00536478	1
BP	protein delipidation	1	1	0.00553592	1
BP	positive regulation of cytoskeleton organization	220	4	0.00682424	1
BP	negative regulation of cell junction assembly	30	2	0.00700342	1
BP	regulation of extrathymic T cell differentiation	2	1	0.00704102	1
BP	tRNA threonylcarbamoyladenosine modification	3	1	0.00716635	1
BP	cell-substrate junction assembly	97	3	0.00733241	1
BP	prolyl-tRNA aminoacylation	2	1	0.00773136	1
BP	cell-substrate junction organization	100	3	0.00807568	1
BP	ventricular cardiac muscle cell action potential	36	2	0.00853886	1
BP	negative regulation of ventricular cardiac muscle cell action potential	2	1	0.00872499	1
BP	actin-mediated cell contraction	118	3	0.00892812	1
BP	in utero embryonic development	364	5	0.00902205	1
BP	negative regulation of hydrolase activity	432	5	0.00905538	1
BP	negative regulation of calcium ion transmembrane transport via high voltage-gated calcium channel	3	1	0.00906093	1
BP	endocytosis	542	6	0.00906124	1
BP	negative regulation of cell-matrix adhesion	39	2	0.0093517	1
BP	sarcomere organization	45	2	0.00973768	1
BP	extrathymic T cell differentiation	3	1	0.00976934	1
BP	positive regulation of protein polymerization	129	3	0.00982837	1
GL - all mothers (CpGs with P<0.0001)
ONTOLOGY	TERM	N	DE	P.DE	FDR
MF	propionate CoA-transferase activity	1	1	0.00524504	1
CC	CERF complex	1	1	0.00562979	1
CC	lateral plasma membrane	62	4	0.00709708	1
CC	microtubule minus-end	8	2	0.00715006	1
CC	transferase complex, transferring phosphorus-containing groups	231	7	0.00723795	1
CC	endopeptidase Clp complex	2	1	0.00980253	1
BP	cartilage condensation	21	3	0.00224028	1
BP	negative regulation of GTPase activity	42	4	0.00224979	1
BP	cell aggregation	24	3	0.00266908	1
BP	cell-cell adhesion via plasma-membrane adhesion molecules	264	9	0.00470419	1
BP	cell adhesion	1394	27	0.00722442	1
BP	biological adhesion	1400	27	0.00762809	1
BP	renal glucose absorption	1	1	0.00845463	1
BP	positive regulation of hair cycle	12	2	0.00906127	1
BP	endocardial cell fate commitment	1	1	0.0094733	1
BP	endocardial cushion cell fate commitment	1	1	0.0094733	1
BP	modulation by host of viral RNA genome replication	2	1	0.00956334	1
GI - mothers with normal weight (CpGs with P<0.0001)
ONTOLOGY	TERM	N	DE	P.DE	FDR
MF	histone demethylase activity (H3-K36 specific)	9	2	0.00140817	1
MF	E-box binding	48	3	0.00288517	1
MF	V2 vasopressin receptor binding	1	1	0.00578064	1
MF	N(6)-L-threonylcarbamoyladenine synthase activity	2	1	0.00636018	1
MF	histone demethylase activity	23	2	0.00672889	1
MF	protein demethylase activity	23	2	0.00672889	1
MF	L-gulonate 3-dehydrogenase activity	1	1	0.00930285	1
CC	Z disc	123	5	0.000757373	1
CC	I band	134	5	0.00101799	1
CC	sarcomere	199	5	0.00434633	1
CC	node of Ranvier	15	2	0.00462332	1
CC	NLS-dependent protein nuclear import complex	1	1	0.00512142	1
CC	axon initial segment	16	2	0.00631217	1
CC	myofibril	219	5	0.0065306	1
CC	contractile fiber	230	5	0.00759253	1
CC	lipid tube	1	1	0.00917564	1
CC	protein-lipid complex	37	2	0.00956216	1
BP	extrathymic T cell differentiation	3	2	9.57617e-05	1
BP	protein K6-linked ubiquitination	9	2	0.00081879	1
BP	chylomicron remnant clearance	9	2	0.000903711	1
BP	triglyceride-rich lipoprotein particle clearance	9	2	0.000903711	1
BP	cardiac muscle fiber development	10	2	0.00127286	1
BP	regulation of natural killer cell differentiation	12	2	0.00136094	1
BP	histone H3-K36 demethylation	9	2	0.00140817	1
BP	norepinephrine metabolic process	11	2	0.00166865	1
BP	protein destabilization	46	3	0.00169523	1
BP	adult heart development	13	2	0.00219821	1
BP	negative regulation of phosphatidylcholine catabolic process	1	1	0.00248306	1
BP	response to cortisone	1	1	0.00273713	1
BP	visceral muscle development	1	1	0.00273941	1
BP	natural killer cell differentiation	21	2	0.00393814	1
BP	negative regulation of release of cytochrome c from mitochondria	19	2	0.00395885	1
BP	spontaneous synaptic transmission	14	2	0.00406365	1
BP	circadian regulation of gene expression	62	3	0.00503468	1
BP	regulation of lipoprotein lipase activity	23	2	0.00510492	1
BP	sensory organ development	560	9	0.00512888	1
BP	extrathymic T cell selection	1	1	0.00555129	1
BP	semaphorin-plexin signaling pathway involved in outflow tract morphogenesis	1	1	0.00580513	1
BP	positive regulation of transcription from RNA polymerase II promoter involved in norepinephrine biosynthetic process	1	1	0.00580513	1
BP	positive regulation of semaphorin-plexin signaling pathway involved in outflow tract morphogenesis	1	1	0.00580513	1
BP	positive regulation of semaphorin-plexin signaling pathway	1	1	0.00580513	1
BP	protein K11-linked ubiquitination	27	2	0.00681706	1
BP	regulation of natural killer cell activation	32	2	0.00724979	1
BP	histone lysine demethylation	24	2	0.00726533	1
BP	histone demethylation	25	2	0.00757661	1
BP	protein demethylation	27	2	0.00824897	1
BP	protein dealkylation	27	2	0.00824897	1
BP	sebum secreting cell proliferation	1	1	0.00838333	1
BP	primary palate development	2	1	0.00856825	1
BP	artery morphogenesis	75	3	0.00920577	1
BP	tRNA threonylcarbamoyladenosine modification	3	1	0.00929293	1
BP	regulation of protein linear polyubiquitination	1	1	0.00980681	1
BP	positive regulation of protein linear polyubiquitination	1	1	0.00980681	1
BP	initiation of neural tube closure	1	1	0.009923	1
GI - mothers with overweight (CpGs with P<0.0001)
ONTOLOGY	TERM	N	DE	P.DE	FDR
CC	glucosidase II complex	2	2	0.00343891	1
CC	ripoptosome	6	3	0.00438504	1
CC	Ino80 complex	15	4	0.00782674	1
CC	DNA helicase complex	15	4	0.00782674	1
CC	cohesin complex	9	3	0.00901926	1
BP	N-glycan processing	18	6	0.000985319	1
BP	positive regulation of calcium ion-dependent exocytosis	18	6	0.00110846	1
BP	hepatic stellate cell activation	8	4	0.00165219	1
BP	positive regulation of synaptic vesicle fusion to presynaptic active zone membrane	4	3	0.00184453	1
BP	calcium-dependent activation of synaptic vesicle fusion	4	3	0.00184453	1
BP	axis elongation involved in somitogenesis	4	3	0.00215132	1
BP	positive regulation of glycogen (starch) synthase activity	5	3	0.00277711	1
BP	lens epithelial cell proliferation	2	2	0.00373059	1
BP	regulation of lens epithelial cell proliferation	2	2	0.00373059	1
BP	positive regulation of lens epithelial cell proliferation	2	2	0.00373059	1
BP	positive regulation of vesicle fusion	11	4	0.00478432	1
BP	cell fate commitment	271	31	0.0053912	1
BP	microtubule cytoskeleton organization involved in mitosis	135	16	0.00546356	1
BP	fibroblast activation	12	4	0.00584433	1
BP	G protein-coupled acetylcholine receptor signaling pathway	19	5	0.0067105	1
BP	negative regulation of cAMP-mediated signaling	26	6	0.00696249	1
BP	mitotic cytokinetic process	23	5	0.00724188	1
BP	asymmetric cell division	19	5	0.00739058	1
BP	canonical Wnt signaling pathway involved in regulation of type B pancreatic cell proliferation	2	2	0.00830318	1
BP	regulation of canonical Wnt signaling pathway involved in controlling type B pancreatic cell proliferation	2	2	0.00830318	1
BP	spinal cord interneuron axon guidance	2	2	0.00851393	1
BP	dorsal spinal cord interneuron axon guidance	2	2	0.00851393	1
BP	negative regulation of non-canonical Wnt signaling pathway	6	3	0.00888173	1
BP	nephric duct morphogenesis	11	4	0.0090212	1
BP	regulation of glycogen (starch) synthase activity	7	3	0.00907173	1
BP	postsynaptic signal transduction	35	7	0.00917342	1
GL - mothers with normal weight (CpGs with P<0.0001)
ONTOLOGY	TERM	N	DE	P.DE	FDR
MF	propionate CoA-transferase activity	1	1	0.00505131	1
MF	potassium ion binding	12	2	0.00837478	1
MF	axon guidance receptor activity	8	2	0.00895548	1
MF	1,4-alpha-glucan branching enzyme activity	1	1	0.00914946	1
MF	1,4-alpha-glucan branching enzyme activity (using a glucosylated glycogenin as primer for glycogen synthesis)	1	1	0.00914946	1
CC	nuclear lamina	9	2	0.00555484	1
CC	microtubule minus-end	8	2	0.00707906	1
CC	lateral plasma membrane	62	4	0.00708083	1
CC	bicellular tight junction	112	5	0.00984952	1
CC	A band	36	3	0.00992863	1
CC	mitochondrial proton-transporting ATP synthase, stator stalk	2	1	0.00996427	1
CC	proton-transporting ATP synthase, stator stalk	2	1	0.00996427	1
BP	regulation of cell cycle	1149	25	0.000158159	1
BP	cell cycle	1768	33	0.000194802	1
BP	negative regulation of cell cycle	602	15	0.000725708	1
BP	cell cycle checkpoint	212	8	0.000968217	1
BP	mitotic cell cycle checkpoint	162	7	0.00106572	1
BP	neuron recognition	50	5	0.00140566	1
BP	mammary gland alveolus development	17	3	0.00150705	1
BP	mammary gland lobule development	17	3	0.00150705	1
BP	regulation of mammary gland epithelial cell proliferation	17	3	0.00154593	1
BP	osteoclast development	17	3	0.0016453	1
BP	cell cycle process	1339	24	0.00216037	1
BP	determination of left/right symmetry	118	6	0.00230649	1
BP	DNA damage checkpoint	145	6	0.00240381	1
BP	regulation of heart morphogenesis	41	4	0.0026979	1
BP	cell cycle arrest	227	8	0.00270659	1
BP	mammary gland epithelium development	69	5	0.00295718	1
BP	determination of bilateral symmetry	127	6	0.00302864	1
BP	DNA integrity checkpoint	155	6	0.00313081	1
BP	cardiac endothelial cell differentiation	6	2	0.00319492	1
BP	endocardial cell differentiation	6	2	0.00319492	1
BP	positive regulation of cardiac muscle cell contraction	6	2	0.00321184	1
BP	positive regulation of actin filament-based movement	6	2	0.00321184	1
BP	specification of symmetry	128	6	0.00321748	1
BP	endocardial cushion development	45	4	0.00372047	1
BP	mitotic cell cycle phase transition	572	13	0.00384684	1
BP	endocardial cushion formation	24	3	0.00387976	1
BP	axon midline choice point recognition	5	2	0.00411726	1
BP	regulation of mitotic cell cycle	633	14	0.00418679	1
BP	mitotic cell cycle process	861	17	0.0042549	1
BP	negative regulation of chemokine-mediated signaling pathway	6	2	0.00436073	1
BP	negative regulation of phosphatidylcholine catabolic process	1	1	0.00438362	1
BP	mitotic cell cycle	1005	19	0.00454448	1
BP	negative regulation of gene silencing	35	3	0.00489399	1
BP	regulation of osteoclast development	11	2	0.00510408	1
BP	keratinocyte activation	1	1	0.00512647	1
BP	spliceosomal tri-snRNP complex assembly	15	2	0.00545626	1
BP	regulation of metaphase plate congression	8	2	0.0055149	1
BP	G1/S transition of mitotic cell cycle	271	8	0.00583788	1
BP	mammary gland epithelial cell proliferation	28	3	0.00591174	1
BP	regulation of chemokine-mediated signaling pathway	9	2	0.00592824	1
BP	axon choice point recognition	7	2	0.00598307	1
BP	positive regulation of cardiac epithelial to mesenchymal transition	8	2	0.00622337	1
BP	glossopharyngeal nerve development	5	2	0.00623384	1
BP	mesenchyme morphogenesis	52	4	0.00668781	1
BP	regulation of glial cell proliferation	31	3	0.00678273	1
BP	regulation of cardiac epithelial to mesenchymal transition	9	2	0.00679473	1
BP	cell cycle phase transition	612	13	0.00684323	1
BP	negative regulation of lipoprotein particle clearance	19	2	0.00699556	1
BP	regulation of G1/S transition of mitotic cell cycle	176	6	0.00730617	1
BP	regulation of mitotic cell cycle phase transition	425	10	0.00761541	1
BP	negative regulation of immune system process	430	10	0.00790174	1
BP	negative regulation of cell population proliferation	729	16	0.0080466	1
BP	cell cycle G1/S phase transition	289	8	0.0082438	1
BP	anoikis	33	3	0.00827312	1
BP	positive regulation of hair cycle	12	2	0.00906564	1
BP	mammary gland development	135	6	0.0093031	1
BP	modulation by host of viral RNA genome replication	2	1	0.00937497	1
BP	positive regulation of cell cycle process	288	8	0.0094178	1
BP	endocardial cell fate commitment	1	1	0.00962311	1
BP	endocardial cushion cell fate commitment	1	1	0.00962311	1
BP	endocardium development	11	2	0.00962368	1
BP	positive regulation of epidermis development	43	3	0.00964671	1
GL - mothers with overweight (CpGs with P<0.0001)
ONTOLOGY	TERM	N	DE	P.DE	FDR
MF	bioactive lipid receptor activity	14	2	0.00644694	1
MF	volume-sensitive anion channel activity	9	2	0.00714489	1
MF	glutathione peroxidase activity	19	2	0.00714865	1
MF	delta3,5-delta2,4-dienoyl-CoA isomerase activity	1	1	0.00917168	1
MF	heparan-alpha-glucosaminide N-acetyltransferase activity	1	1	0.00918635	1
CC	presynaptic cytoskeleton	7	2	0.00620486	1
CC	collagen type XV trimer	1	1	0.00925697	1
CC	interleukin-5 receptor complex	1	1	0.00926075	1
BP	endothelial cell development	60	5	0.00130147	1
BP	protein import into peroxisome membrane	6	2	0.0015047	1
BP	negative regulation of platelet-derived growth factor receptor-beta signaling pathway	4	2	0.0023675	1
BP	hair follicle morphogenesis	27	3	0.0050882	1
BP	epidermis morphogenesis	31	3	0.00641417	1
BP	nervous system process involved in regulation of systemic arterial blood pressure	9	2	0.0077658	1
BP	regulation of systemic arterial blood pressure by ischemic conditions	1	1	0.00872822	1

## Sheet: ST13. EWAS Catalog
Supplementary Table 13. EWAS Catalog lookup for n=3 CpGs associated with maternal GI or GL from the main non-stratified meta-analyses.
CpG	EWAS Catalog trait	EWAS Catalog author	EWAS Catalog PMID	EWAS Catalog tissue	EWAS Catalog array	EWAS Catalog N
cg21301148	Tissue	Battram T	30602389	Buccal cells and peripheral blood mononuclear cells	Illumina HumanMethylation450	215
cg21301148	Age	Mulder RH	33450751	Whole blood	Illumina HumanMethylation450	2338
cg21301148	Clear cell renal carcinoma	Wozniak MB	23526956	Clear cell renal carcinoma tumour cells, adjacent healthy cells	Illumina HumanMethylation450	219
cg21301148	Fetal vs adult liver	Bonder MJ	25282492	Liver	Illumina HumanMethylation450	195
cg21301148	Gestational age	Spiers H	25650246	Fetal brain	Illumina HumanMethylation450	179
cg21301148	Age 4 vs age 0	Xu CJ	28056824	Whole blood, cord blood	Illumina HumanMethylation450	269
cg21301148	Age	Battram T	23177740	Whole blood	Illumina HumanMethylation450	656
cg21301148	Age*sex	Mulder RH	33450751	Whole blood	Illumina HumanMethylation450	2338
cg21301148	Alcohol consumption	Dugue P-A	31789449	Whole blood	Illumina HumanMethylation450	5606
cg21301148	Aging	Wang Y	30264654	Whole blood	Illumina HumanMethylation450	1011
cg27528695	Age	Mulder RH	33450751	Whole blood	Illumina HumanMethylation450	2338
cg27528695	HIV infection	Gross AM	27105112	Whole blood	Illumina HumanMethylation450	181
CpG: cytosine-phosphate-guanine site. PMID: PubMed ID for the publication. N: sample size for the EWAS.
